# Supplementary material for: Leveraging a reduced polyoxomolybdate-alkoxide cluster for the formation of a stable U( v ) sandwich complex
Source: Royal Society of Chemistry journal article supplement (doi:10.1039/d4sc02644f), 2024-01-01
Supplement: d4sc02644f1.pdf [file d4sc02644f1.pdf]

## Electronic Supporting Information

### **Leveraging a reduced polyoxomolybdate-alkoxide cluster for the formation of a stable U(V) sandwich complex**

Dominic Shiels<sup>1\*</sup>, William W. Brennessel<sup>1</sup>, Matthew R. Crawley<sup>2</sup>, and Ellen M. Matson<sup>1\*</sup>

<sup>1</sup> *Department of Chemistry, University of Rochester, Rochester NY, 14627 USA*

<sup>2</sup> *Department of Chemistry, University at Buffalo, The State University of New York, Buffalo  
NY 14620, USA.*

#### **Corresponding Author Contact Information:**

Dominic Shiels: [dshiels@ur.rochester.edu](mailto:dshiels@ur.rochester.edu)

Ellen M. Matson: [matson@chem.rochester.edu](mailto:matson@chem.rochester.edu)

## Contents

|                                                                                                                                                                                                                                                                                                                                                                                                                                                                                                                                                                                        |           |
|----------------------------------------------------------------------------------------------------------------------------------------------------------------------------------------------------------------------------------------------------------------------------------------------------------------------------------------------------------------------------------------------------------------------------------------------------------------------------------------------------------------------------------------------------------------------------------------|-----------|
| <b>1. <math>^1\text{H}</math> NMR spectra .....</b>                                                                                                                                                                                                                                                                                                                                                                                                                                                                                                                                    | <b>S4</b> |
| <b>Figure S1:</b> $^1\text{H}$ NMR spectrum (400 MHz) of $(\text{TBA})_2[\text{Mo}_5\text{O}_{13}(\text{OMe})_4\text{NO}][\text{Na}(\text{MeOH})]$ ( <b>1-NaMo<sub>5</sub></b> ) in $\text{CD}_3\text{CN}$ . The peak marked with an asterisk corresponds to MeOH. ....                                                                                                                                                                                                                                                                                                                | S4        |
| <b>Figure S2:</b> $^1\text{H}$ NMR spectrum (500 MHz) of $(\text{TBA})_4[\text{Ba}\{\text{Mo}_5\text{O}_{13}(\text{OMe})_4\text{NO}\}_2]$ in $\text{CD}_3\text{CN}$ . Peaks marked with an asterisk correspond to MeOH. ....                                                                                                                                                                                                                                                                                                                                                           | S5        |
| <b>Figure S3:</b> $^1\text{H}$ NMR spectrum (500 MHz) of $(\text{TBA})_3[\text{Bi}\{\text{Mo}_5\text{O}_{13}(\text{OMe})_4\text{NO}\}_2]$ in $\text{CD}_3\text{CN}$ .....                                                                                                                                                                                                                                                                                                                                                                                                              | S6        |
| <b>Figure S4:</b> $^1\text{H}$ NMR spectrum (500 MHz) of $(\text{TBA})_2[\text{Zr}\{\text{Mo}_5\text{O}_{13}(\text{OMe})_4\text{NO}\}_2]$ ( <b>2-Zr(Mo<sub>5</sub>)<sub>2</sub></b> ) in $\text{CD}_2\text{Cl}_2$ .....                                                                                                                                                                                                                                                                                                                                                                | S7        |
| <b>Figure S5:</b> $^1\text{H}$ NMR spectrum (500 MHz) of $(\text{TBA})_2[\text{Hf}\{\text{Mo}_5\text{O}_{13}(\text{OMe})_4\text{NO}\}_2]$ ( <b>3-Hf(Mo<sub>5</sub>)<sub>2</sub></b> ) in $\text{CD}_2\text{Cl}_2$ .....                                                                                                                                                                                                                                                                                                                                                                | S8        |
| <b>Figure S6:</b> $^1\text{H}$ NMR spectrum (500 MHz) of $(\text{TBA})_2[\text{Th}\{\text{Mo}_5\text{O}_{13}(\text{OMe})_4\text{NO}\}_2]$ ( <b>4-Th(Mo<sub>5</sub>)<sub>2</sub></b> ) in $\text{CD}_2\text{Cl}_2$ .....                                                                                                                                                                                                                                                                                                                                                                | S9        |
| <b>Figure S7:</b> $^1\text{H}$ NMR spectrum (500 MHz) of $(\text{TBA})_2[\text{U}\{\text{Mo}_5\text{O}_{13}(\text{OMe})_4\text{NO}\}_2]$ ( <b>5-U(Mo<sub>5</sub>)<sub>2</sub></b> ) in $\text{CD}_2\text{Cl}_2$ . Peaks marked with asterisks correspond to toluene impurity. ....                                                                                                                                                                                                                                                                                                     | S10       |
| <b>Figure S8:</b> $^1\text{H}$ NMR spectrum (500 MHz) of $(\text{TBA})_2[\text{U}\{\text{Mo}_5\text{O}_{13}(\text{OMe})_4\text{NO}\}_2]$ ( <b>5-U(Mo<sub>5</sub>)<sub>2</sub></b> ) in $\text{CDCl}_3$ .....                                                                                                                                                                                                                                                                                                                                                                           | S11       |
| <b>Figure S9:</b> $^1\text{H}$ NMR spectrum (500 MHz) of $(\text{TBA})_2[\text{U}\{\text{Mo}_5\text{O}_{13}(\text{OMe})_4\text{NO}\}_2]$ ( <b>5-U(Mo<sub>5</sub>)<sub>2</sub></b> ) in acetone- $d_6$ . ....                                                                                                                                                                                                                                                                                                                                                                           | S12       |
| <b>Figure S10:</b> $^1\text{H}$ NMR spectrum (500 MHz) of $(\text{TBA})_2[\text{U}\{\text{Mo}_5\text{O}_{13}(\text{OMe})_4\text{NO}\}_2]$ ( <b>5-U(Mo<sub>5</sub>)<sub>2</sub></b> ) in $\text{CD}_3\text{CN}$ . ....                                                                                                                                                                                                                                                                                                                                                                  | S13       |
| <b>Figure S11:</b> $^1\text{H}$ NMR spectrum (500 MHz) of $(\text{TBA})_2[\text{U}\{\text{Mo}_5\text{O}_{13}(\text{OMe})_4\text{NO}\}_2]$ ( <b>5-U(Mo<sub>5</sub>)<sub>2</sub></b> ) in $\text{DMSO}-d_6$ . ....                                                                                                                                                                                                                                                                                                                                                                       | S14       |
| <b>Figure S12:</b> $^1\text{H}$ DOSY NMR spectrum (500 MHz) of a 2mM solution $(\text{TBA})_2[\text{U}\{\text{Mo}_5\text{O}_{13}(\text{OMe})_4\text{NO}\}_2]$ ( <b>5-U(Mo<sub>5</sub>)<sub>2</sub></b> ) in $\text{CDCl}_3$ . The obtained diffusion coefficient (D in $\text{m}^2/\text{s}$ ) for each peak in the $^1\text{H}$ NMR spectrum is given with the standard deviation ( $\sigma$ -D). The peaks at -2.723, -3.915, and -4.188 ppm can be assigned to the TBA cation, while the peak at 9.663 ppm is assigned to $\{\text{U}(\text{Mo}_5)_2\}$ cluster. ....               | S15       |
| <b>Figure S13:</b> $^1\text{H}$ DOSY NMR spectrum (500 MHz) of a 2 mM solution of $(\text{TBA})_2[\text{U}\{\text{Mo}_5\text{O}_{13}(\text{OMe})_4\text{NO}\}_2]$ ( <b>5-U(Mo<sub>5</sub>)<sub>2</sub></b> ) in $\text{CD}_3\text{CN}$ . The obtained diffusion coefficient (D in $\text{m}^2/\text{s}$ ) for each peak in the $^1\text{H}$ NMR spectrum is given with the standard deviation ( $\sigma$ -D). The peaks at 0.093, 0.195, 1.251 and 1.696 ppm can be assigned to the TBA cation, while the peak at 9.519 ppm is assigned to $\{\text{U}(\text{Mo}_5)_2\}$ cluster. .... | S16       |
| <b>Figure S14:</b> $^1\text{H}$ NMR spectrum (500 MHz) of crude $(\text{TBA})[\text{U}\{\text{Mo}_5\text{O}_{13}(\text{OMe})_4\text{NO}\}_2]$ ( <b>6-U(Mo<sub>5</sub>)<sub>2</sub></b> ), obtained from oxidation of $(\text{TBA})_2[\text{U}\{\text{Mo}_5\text{O}_{13}(\text{OMe})_4\text{NO}\}_2]$ ( <b>5-U(Mo<sub>5</sub>)<sub>2</sub></b> ) with an excess of                                                                                                                                                                                                                      |           |

|                                                                                                                                                                                                                                                                  |            |
|------------------------------------------------------------------------------------------------------------------------------------------------------------------------------------------------------------------------------------------------------------------|------------|
| [NO][PF <sub>6</sub> ]. Spectrum recorded in CD <sub>2</sub> Cl <sub>2</sub> . The peak marked with an asterisk corresponds to the -OMe groups of <b>5-U(Mo<sub>5</sub>)<sub>2</sub></b> . .....                                                                 | S17        |
| <b>2. Electronic absorption spectra</b> .....                                                                                                                                                                                                                    | <b>S18</b> |
| <b>Figure S15:</b> UV-Vis spectra of 1 mM, 2 mM, 3 mM, and 4 mM solutions <b>1-NaMo<sub>5</sub></b> in MeCN. ....                                                                                                                                                | S18        |
| <b>Figure S16:</b> Conc. vs abs. plot at the $\lambda_{\max}$ (546 nm) for <b>1-NaMo<sub>5</sub></b> in MeCN. ....                                                                                                                                               | S18        |
| <b>Figure S17:</b> UV-Vis spectra of 0.5 mM, 0.75 mM, 1 mM, and 2 mM solutions of (TBA) <sub>4</sub> [Ba{Mo <sub>5</sub> O <sub>13</sub> (OMe) <sub>4</sub> NO <sub>2</sub> } <sub>2</sub> ] in MeCN. ....                                                       | S19        |
| <b>Figure S18:</b> Conc. vs abs. plot at the $\lambda_{\max}$ (550 nm) for (TBA) <sub>4</sub> [Ba{Mo <sub>5</sub> O <sub>13</sub> (OMe) <sub>4</sub> NO <sub>2</sub> } <sub>2</sub> ] in MeCN. ....                                                              | S19        |
| <b>Figure S19:</b> UV-Vis spectra of 0.5 mM, 1 mM, 1.5 mM, and 2 mM solutions of (TBA) <sub>3</sub> [Bi{Mo <sub>5</sub> O <sub>13</sub> (OMe) <sub>4</sub> NO <sub>2</sub> } <sub>2</sub> ] in MeCN. ....                                                        | S20        |
| <b>Figure S20:</b> Conc. vs abs. plot at the $\lambda_{\max}$ (560 nm) for (TBA) <sub>3</sub> [Bi{Mo <sub>5</sub> O <sub>13</sub> (OMe) <sub>4</sub> NO <sub>2</sub> } <sub>2</sub> ] in MeCN. ....                                                              | S20        |
| <b>Figure S21:</b> UV-Vis spectra of 0.5 mM, 1 mM, 1.5 mM, and 2 mM solutions of <b>2-Zr(Mo<sub>5</sub>)<sub>2</sub></b> in MeCN. ....                                                                                                                           | S21        |
| <b>Figure S22:</b> Conc. vs abs. plot at the $\lambda_{\max}$ (588 nm) for <b>2-Zr(Mo<sub>5</sub>)<sub>2</sub></b> in MeCN. ....                                                                                                                                 | S21        |
| <b>Figure S23:</b> UV-Vis spectra of 0.75 mM, 1 mM, 1.5 mM, and 2 mM solutions of <b>3-Hf(Mo<sub>5</sub>)<sub>2</sub></b> in MeCN. ....                                                                                                                          | S22        |
| <b>Figure S24:</b> Conc. vs abs. plot at the $\lambda_{\max}$ (588 nm) for <b>3-Hf(Mo<sub>5</sub>)<sub>2</sub></b> in MeCN. ....                                                                                                                                 | S22        |
| <b>Figure S25:</b> UV-Vis spectra of 0.75 mM, 1 mM, 1.5 mM, and 2 mM solutions of <b>4-Th(Mo<sub>5</sub>)<sub>2</sub></b> in MeCN. ....                                                                                                                          | S23        |
| <b>Figure S26:</b> Conc. vs abs. plot at the $\lambda_{\max}$ (572 nm) for <b>4-Th(Mo<sub>5</sub>)<sub>2</sub></b> in MeCN. ....                                                                                                                                 | S23        |
| <b>Figure S27:</b> UV-Vis spectra of 0.5 mM, 1 mM, 1.5 mM, and 2 mM solutions of <b>5-U(Mo<sub>5</sub>)<sub>2</sub></b> in MeCN. ....                                                                                                                            | S24        |
| <b>Figure S28:</b> Conc. vs abs. plot for the <i>f-f</i> transition at 682 nm of <b>5-U(Mo<sub>5</sub>)<sub>2</sub></b> in MeCN. ..                                                                                                                              | S24        |
| <b>Figure S29:</b> Conc. vs abs. plot for the <i>f-f</i> transition at 1100 nm of <b>5-U(Mo<sub>5</sub>)<sub>2</sub></b> in MeCN. S25                                                                                                                            | S25        |
| <b>Figure S30:</b> Conc. vs abs. plot for the <i>f-f</i> transition at 1156 nm of <b>5-U(Mo<sub>5</sub>)<sub>2</sub></b> in MeCN. S25                                                                                                                            | S25        |
| <b>Figure S31:</b> UV-Vis/NIR spectra of <b>6-U(Mo<sub>5</sub>)<sub>2</sub></b> in DCM at room temperature (21 °C) recorded every day for 5 days. The solution was sealed in a screw-top quartz cuvette and was assumed to protected from air and moisture. .... | S26        |
| <b>3. Single crystal X-ray diffraction information</b> .....                                                                                                                                                                                                     | <b>S27</b> |
| <b>Table S1:</b> Crystallographic parameters for <b>2-Zr(Mo<sub>5</sub>)<sub>2</sub></b> and <b>3-Hf(Mo<sub>5</sub>)<sub>2</sub></b> .....                                                                                                                       | S27        |

|                                                                                                                                                                                                                                                                                                                                                                                |            |
|--------------------------------------------------------------------------------------------------------------------------------------------------------------------------------------------------------------------------------------------------------------------------------------------------------------------------------------------------------------------------------|------------|
| <b>Table S2:</b> Crystallographic parameters for <b>4-Th(Mo<sub>5</sub>)<sub>2</sub></b> and <b>5-U(Mo<sub>5</sub>)<sub>2</sub></b> .....                                                                                                                                                                                                                                      | S28        |
| <b>Table S3:</b> Crystallographic parameters for <b>6-U(Mo<sub>5</sub>)<sub>2</sub></b> .....                                                                                                                                                                                                                                                                                  | S29        |
| <b>Table S4:</b> Average bond length data for the structures discussed. All values in Å. A schematic is given below to highlight bond assignments.....                                                                                                                                                                                                                         | S30        |
| <b>Calculation of U<sup>5+</sup> ionic radius:</b> .....                                                                                                                                                                                                                                                                                                                       | S31        |
| <b>4. Electrochemistry</b> .....                                                                                                                                                                                                                                                                                                                                               | <b>S33</b> |
| <b>Figure S32:</b> CV of (TBA) <sub>4</sub> [Ba{Mo <sub>5</sub> O <sub>13</sub> (OMe) <sub>4</sub> NO <sub>2</sub> } <sub>2</sub> ] (1 mM) in MeCN (0.1 M TBA(PF <sub>6</sub> )). Scan rate = 200 mv/s. ....                                                                                                                                                                   | S33        |
| <b>Figure S33:</b> CV of (TBA) <sub>3</sub> [Bi{Mo <sub>5</sub> O <sub>13</sub> (OMe) <sub>4</sub> NO <sub>2</sub> } <sub>2</sub> ] (1 mM) in MeCN (0.1 M TBA(PF <sub>6</sub> )). Scan rate = 200 mv/s.....                                                                                                                                                                    | S33        |
| <b>Figure S34:</b> CV of (TBA) <sub>2</sub> [Zr{Mo <sub>5</sub> O <sub>13</sub> (OMe) <sub>4</sub> NO <sub>2</sub> } <sub>2</sub> ] (1 mM) in MeCN (0.1 M TBA(PF <sub>6</sub> )) when scanned to more negative potentials. Scan rate = 200 mv/s.....                                                                                                                           | S34        |
| <b>Figure S35:</b> CV of (TBA) <sub>2</sub> [Zr{Mo <sub>5</sub> O <sub>13</sub> (OMe) <sub>4</sub> NO <sub>2</sub> } <sub>2</sub> ] (1 mM) in MeCN (0.1 M TBA(PF <sub>6</sub> )) when scanned to more negative potentials. Scan rate = 200 mv/s.....                                                                                                                           | S34        |
| <b>Figure S36:</b> CV of (TBA) <sub>2</sub> [U{Mo <sub>5</sub> O <sub>13</sub> (OMe) <sub>4</sub> NO <sub>2</sub> } <sub>2</sub> ] (1 mM) in MeCN, DCM, and THF (0.1 M TBA(PF <sub>6</sub> )). Scan rate = 200 mv/s. ....                                                                                                                                                      | S35        |
| <b>Figure S37:</b> Pre bulk electrolysis CV of (TBA) <sub>2</sub> [U{Mo <sub>5</sub> O <sub>13</sub> (OMe) <sub>4</sub> NO <sub>2</sub> } <sub>2</sub> ] (1 mM) in MeCN (0.1 M TBA(PF <sub>6</sub> )). Scan rate = 200 mv/s. ....                                                                                                                                              | S35        |
| <b>Figure S38:</b> Bulk oxidation of a 1 mM solution of (TBA) <sub>2</sub> [U{Mo <sub>5</sub> O <sub>13</sub> (OMe) <sub>4</sub> NO <sub>2</sub> } <sub>2</sub> ] in DCM (0.1 M TBA(PF <sub>6</sub> )). Chronoamperometry was performed at +0.78 V vs Fc/Fc <sup>+</sup> . ....                                                                                                | S36        |
| <b>Figure S39:</b> Post bulk electrolysis CV of (TBA) <sub>2</sub> [U{Mo <sub>5</sub> O <sub>13</sub> (OMe) <sub>4</sub> NO <sub>2</sub> } <sub>2</sub> ] (1 mM) in MeCN (0.1 M TBA(PF <sub>6</sub> )). Scan rate = 200 mv/s. ....                                                                                                                                             | S36        |
| <b>Figure S40:</b> CV of crude (TBA)[U{Mo <sub>5</sub> O <sub>13</sub> (OMe) <sub>4</sub> NO <sub>2</sub> } <sub>2</sub> ] (1 mM) in DCM (0.1 M TBA(PF <sub>6</sub> )) obtained by oxidation of (TBA) <sub>2</sub> [U{Mo <sub>5</sub> O <sub>13</sub> (OMe) <sub>4</sub> NO <sub>2</sub> } <sub>2</sub> ] with an excess of [NO][PF <sub>6</sub> ]. Scan rate = 200 mv/s. .... | S37        |

## 1. $^1\text{H}$ NMR spectra

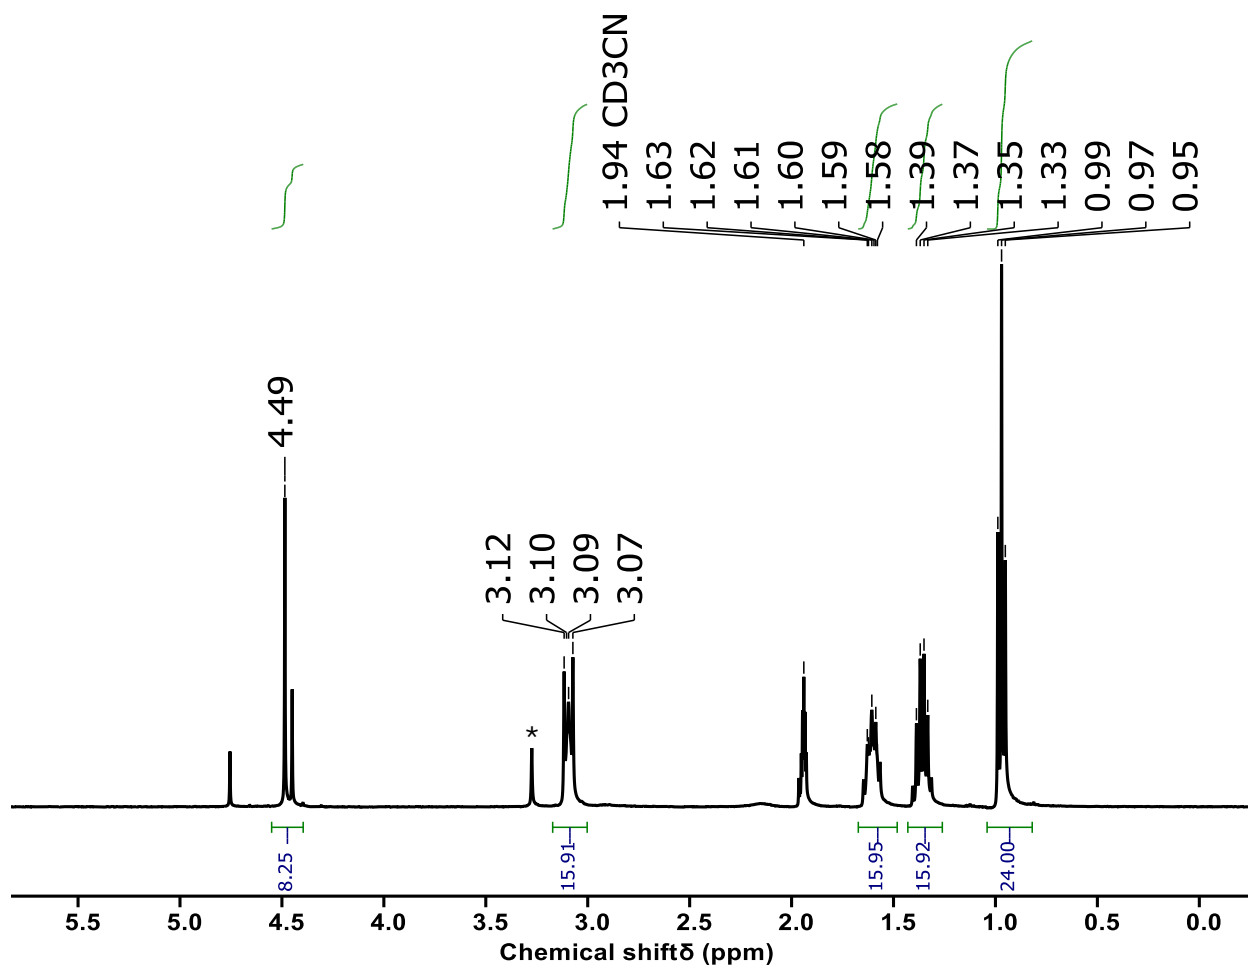

**Figure S1:**  $^1\text{H}$  NMR spectrum (400 MHz) of  $(\text{TBA})_2[\text{Mo}_5\text{O}_{13}(\text{OMe})_4\text{NO}][\text{Na}(\text{MeOH})]$  (**1-NaMo<sub>5</sub>**) in  $\text{CD}_3\text{CN}$ . The peak marked with an asterisk corresponds to MeOH.

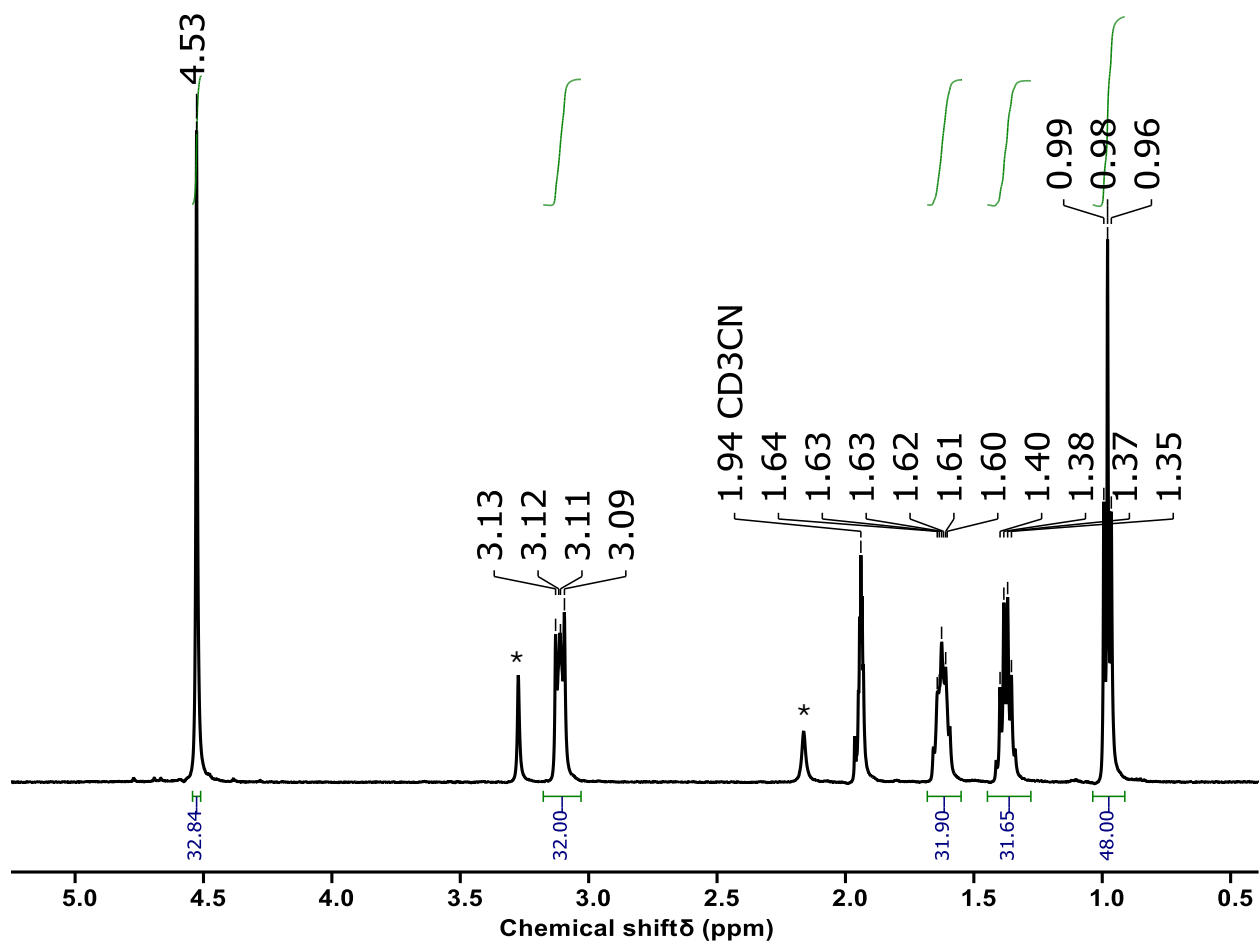

**Figure S2:**  $^1\text{H}$  NMR spectrum (500 MHz) of  $(\text{TBA})_4[\text{Ba}\{\text{Mo}_5\text{O}_{13}(\text{OMe})_4\text{NO}\}_2]$  in  $\text{CD}_3\text{CN}$ . Peaks marked with an asterisk correspond to  $\text{MeOH}$ .

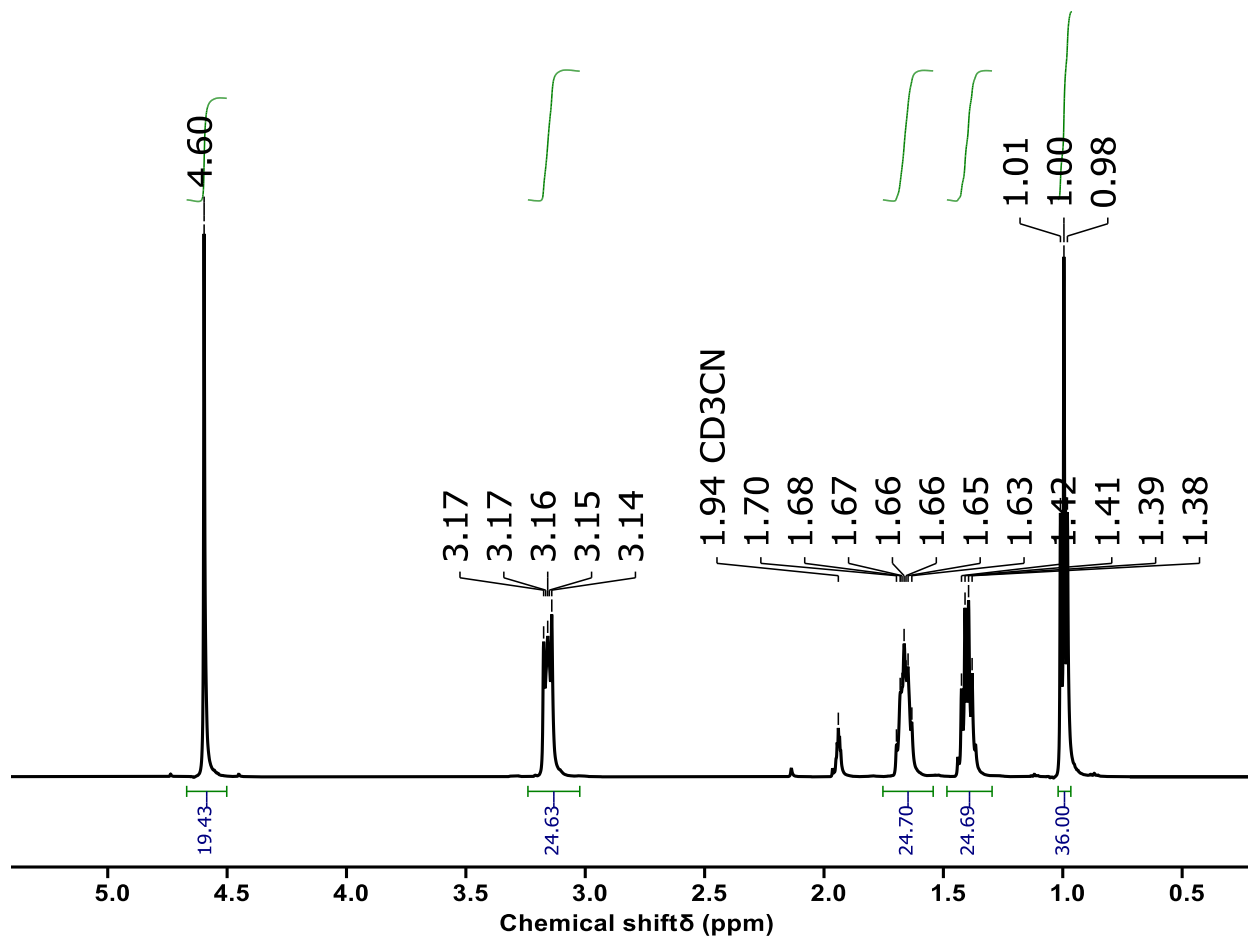

**Figure S3:**  $^1\text{H}$  NMR spectrum (500 MHz) of  $(\text{TBA})_3[\text{Bi}\{\text{Mo}_5\text{O}_{13}(\text{OMe})_4\text{NO}\}_2]$  in  $\text{CD}_3\text{CN}$ .

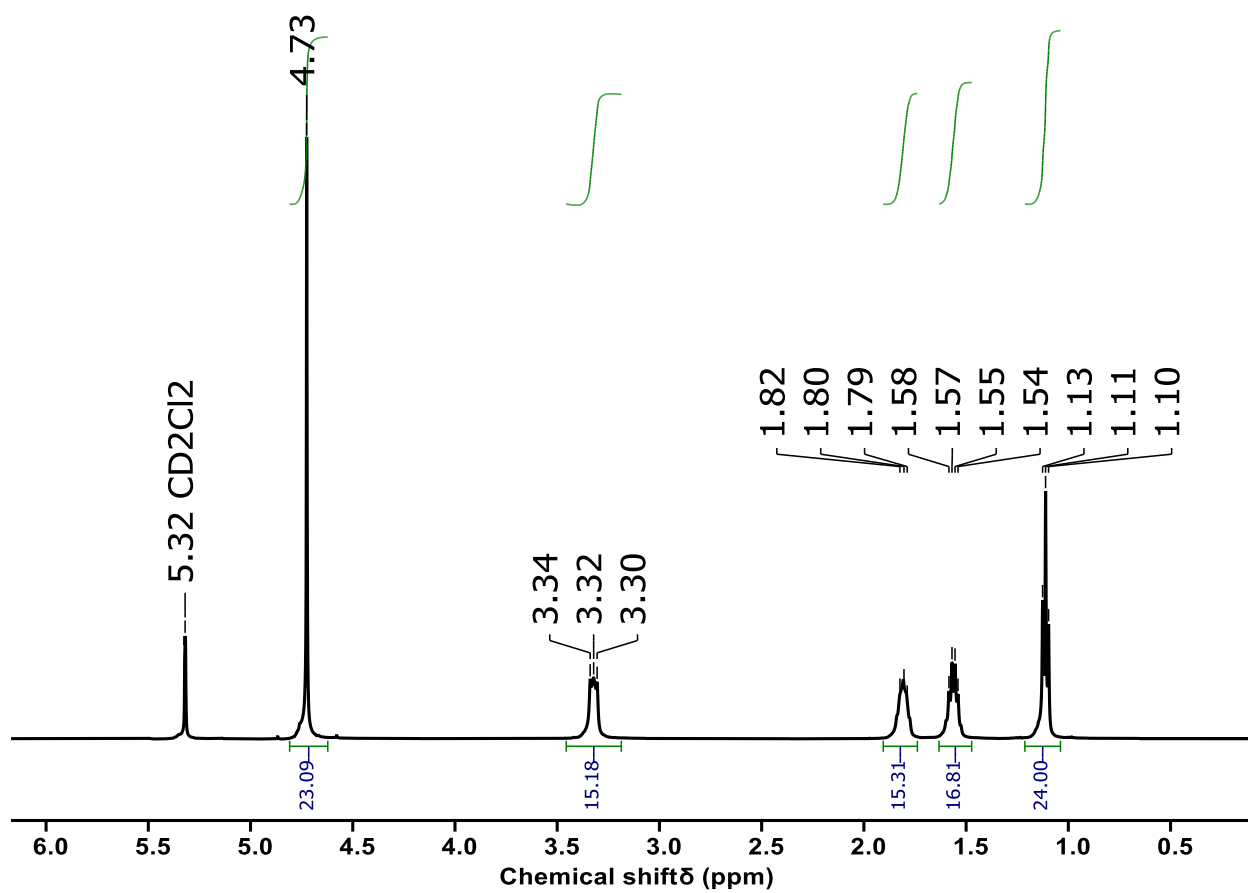

**Figure S4:**  $^1\text{H}$  NMR spectrum (500 MHz) of  $(\text{TBA})_2[\text{Zr}\{\text{Mo}_5\text{O}_{13}(\text{OMe})_4\text{NO}\}_2]$  (**2-Zr(Mo<sub>5</sub>)<sub>2</sub>**) in  $\text{CD}_2\text{Cl}_2$ .



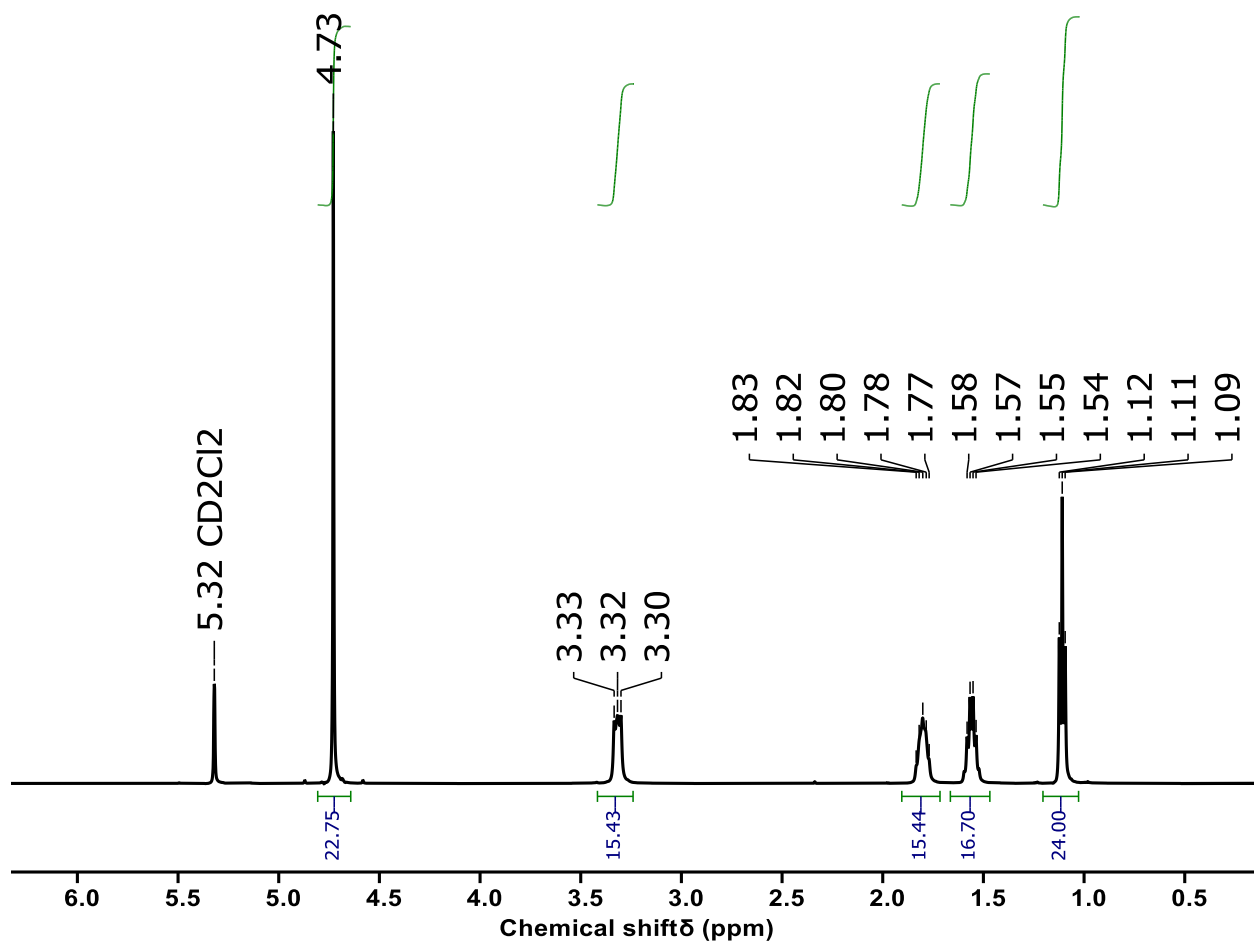

**Figure S5:**  $^1\text{H}$  NMR spectrum (500 MHz) of  $(\text{TBA})_2[\text{Hf}\{\text{Mo}_5\text{O}_{13}(\text{OMe})_4\text{NO}\}_2]$  (**3-Hf(Mo<sub>5</sub>)<sub>2</sub>**) in  $\text{CD}_2\text{Cl}_2$ .

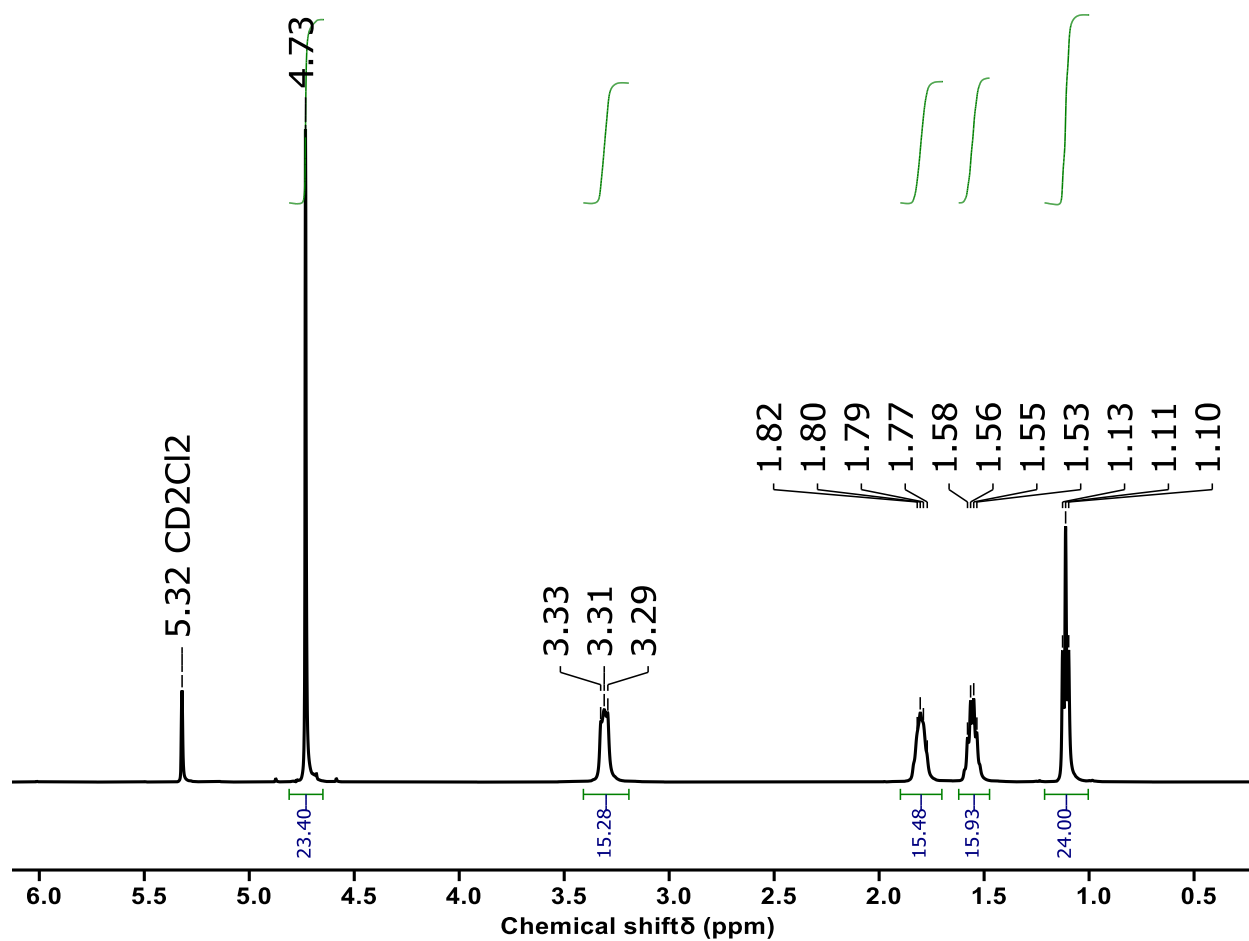

**Figure S6:** <sup>1</sup>H NMR spectrum (500 MHz) of (TBA)<sub>2</sub>[Th{Mo<sub>5</sub>O<sub>13</sub>(OMe)<sub>4</sub>NO}<sub>2</sub>] (**4-Th(Mo<sub>5</sub>)<sub>2</sub>**) in CD<sub>2</sub>Cl<sub>2</sub>.

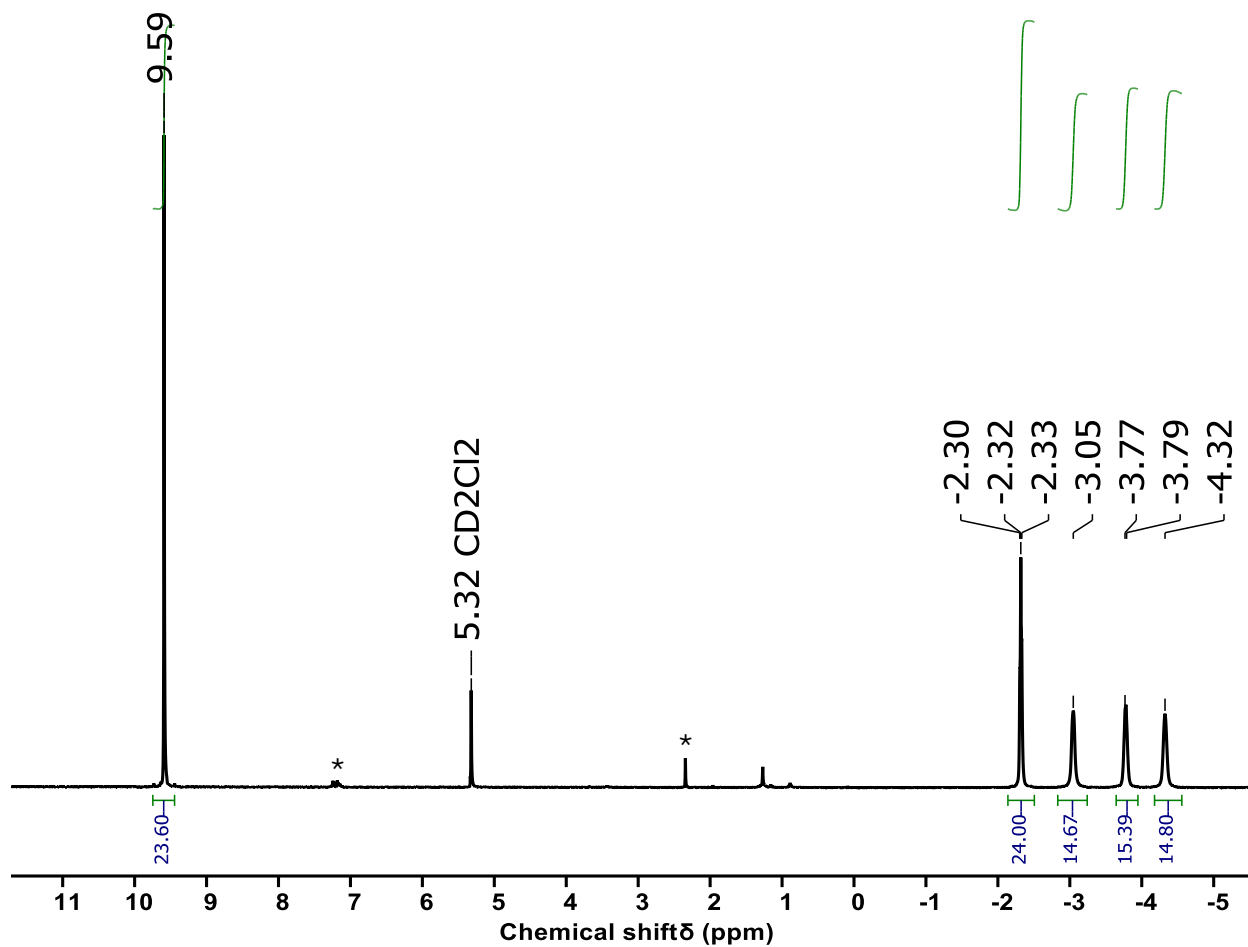

**Figure S7:**  $^1\text{H}$  NMR spectrum (500 MHz) of  $(\text{TBA})_2[\text{U}\{\text{Mo}_5\text{O}_{13}(\text{OMe})_4\text{NO}\}_2]$  (**5-U(Mo<sub>5</sub>)<sub>2</sub>**) in  $\text{CD}_2\text{Cl}_2$ . Peaks marked with asterisks correspond to toluene impurity.

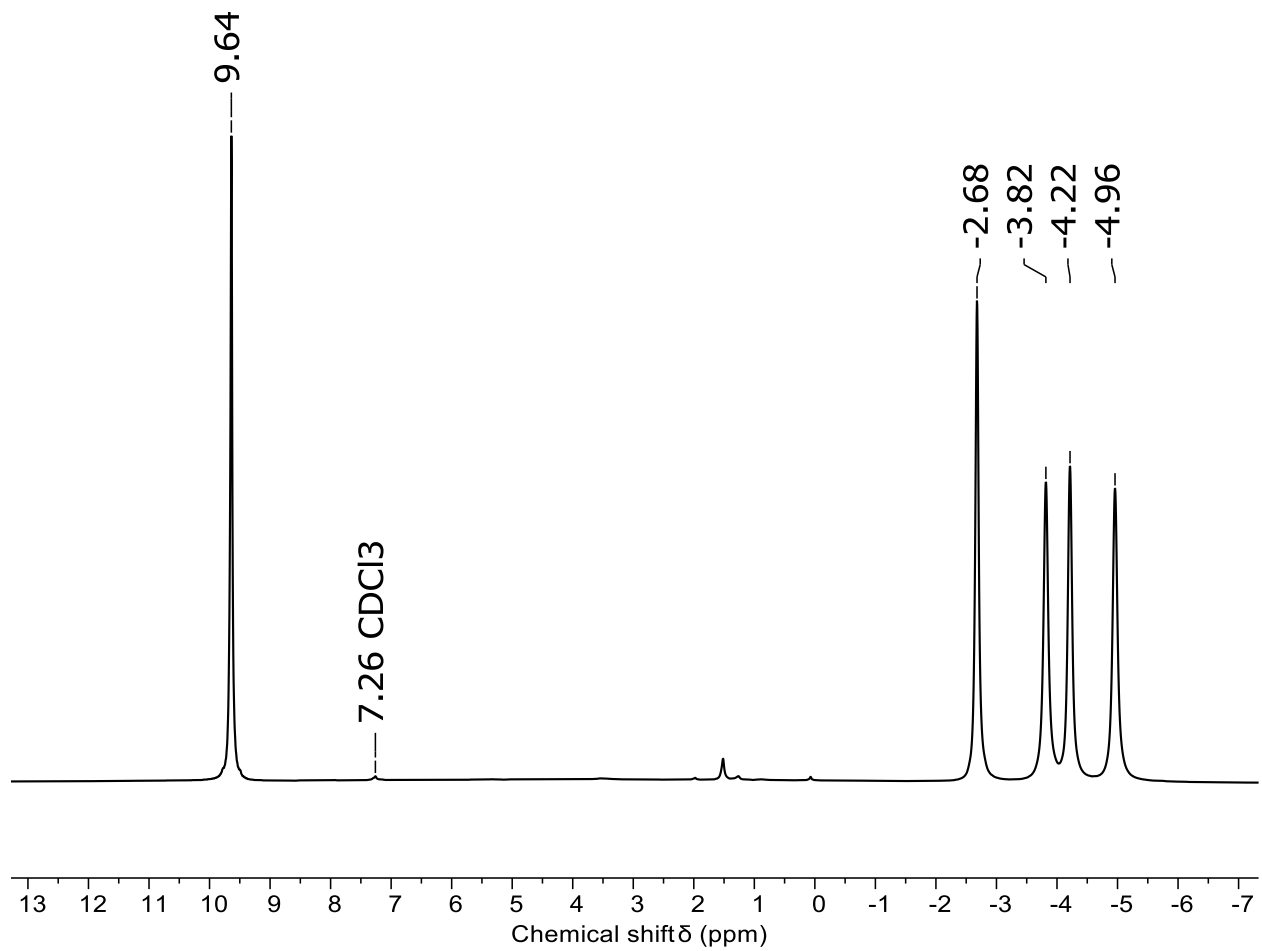

**Figure S8:**  $^1\text{H}$  NMR spectrum (500 MHz) of  $(\text{TBA})_2[\text{U}\{\text{Mo}_5\text{O}_{13}(\text{OMe})_4\text{NO}\}_2]$  (**5-U(Mo<sub>5</sub>)<sub>2</sub>**) in  $\text{CDCl}_3$ .

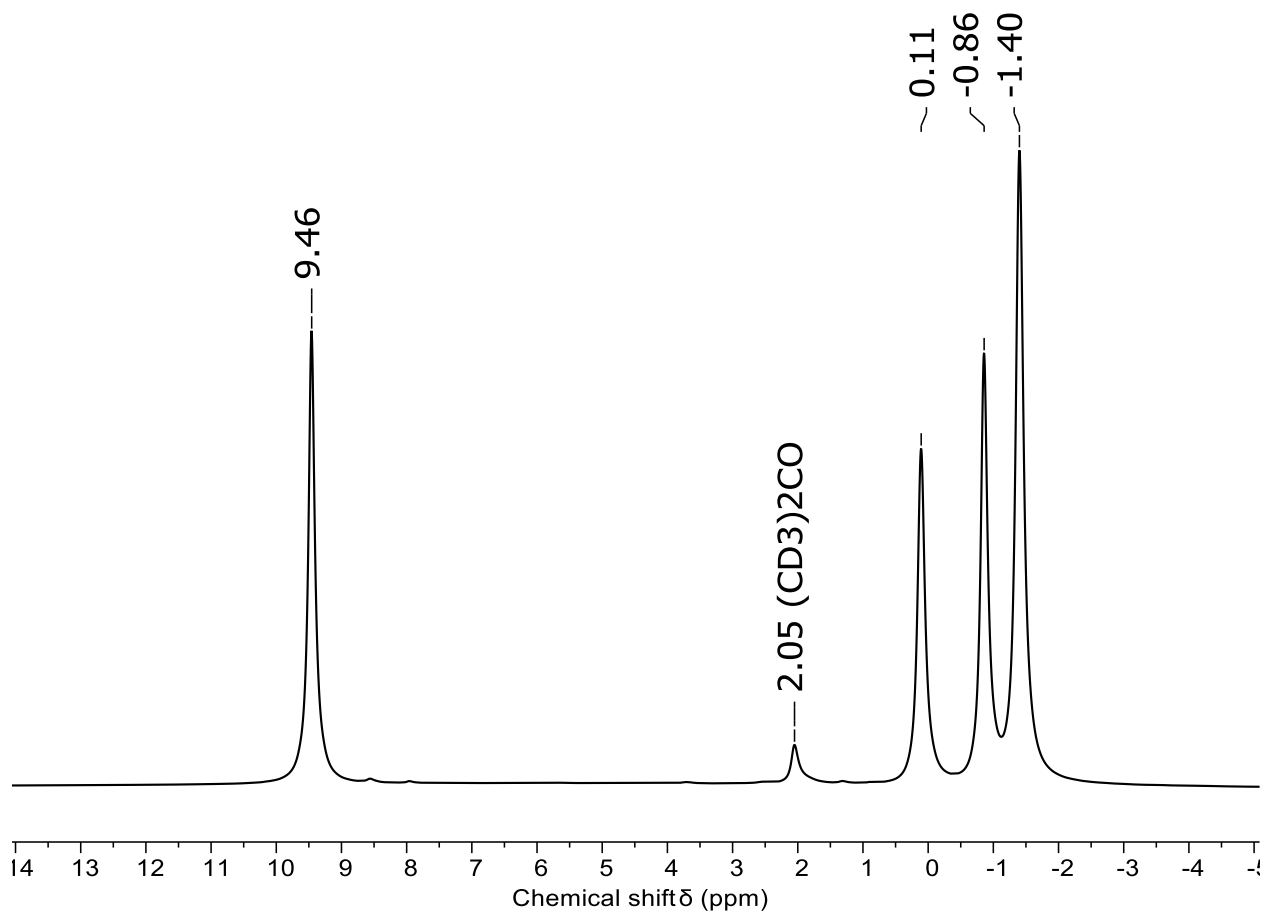

**Figure S9:**  $^1\text{H}$  NMR spectrum (500 MHz) of  $(\text{TBA})_2[\text{U}\{\text{Mo}_5\text{O}_{13}(\text{OMe})_4\text{NO}\}_2]$  (**5-U(Mo<sub>5</sub>)<sub>2</sub>**) in acetone- $\text{d}_6$ .

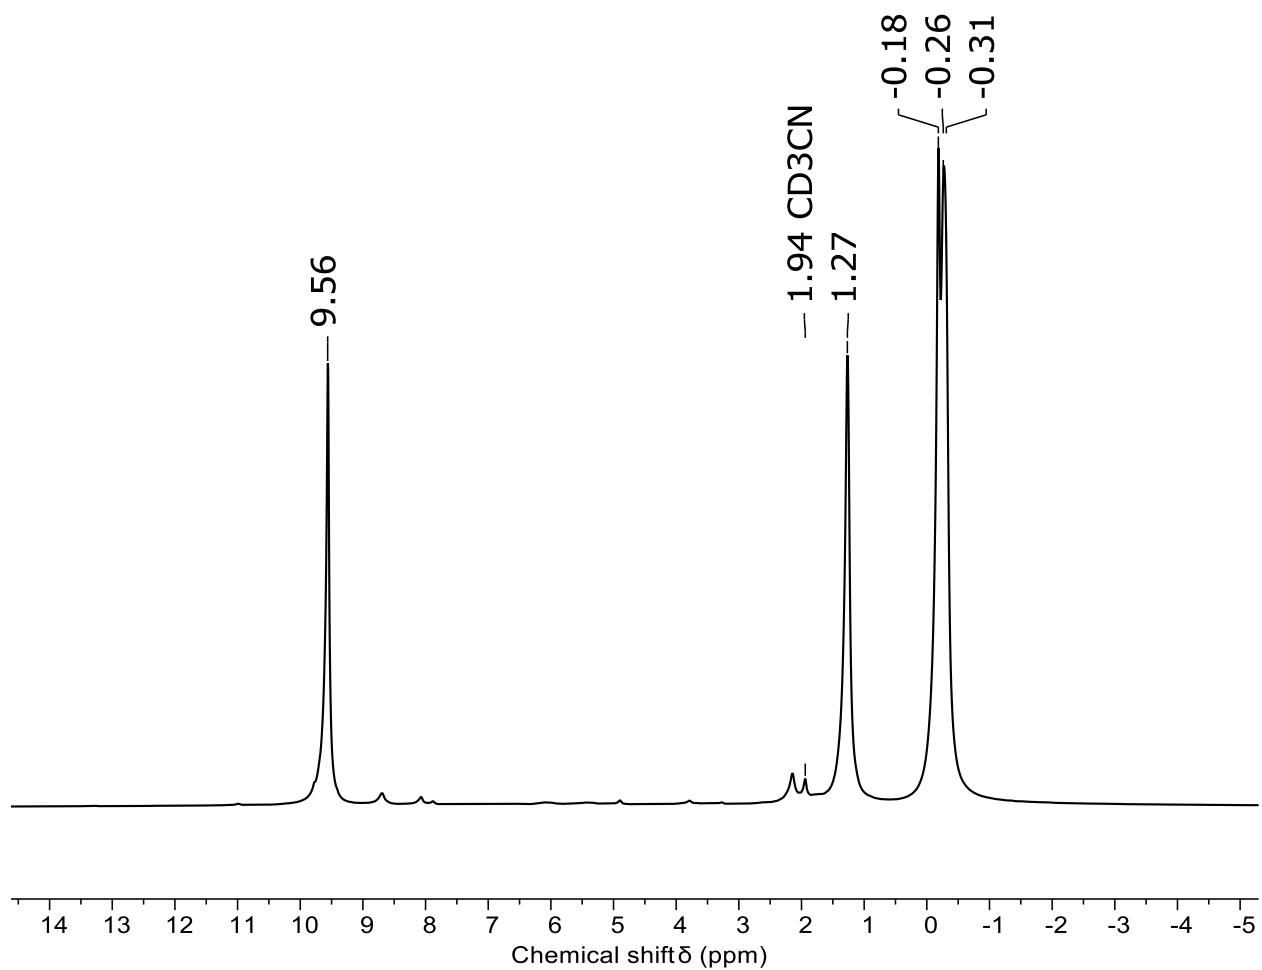

**Figure S10:**  $^1\text{H}$  NMR spectrum (500 MHz) of  $(\text{TBA})_2[\text{U}\{\text{Mo}_5\text{O}_{13}(\text{OMe})_4\text{NO}\}_2]$  (**5-U(Mo<sub>5</sub>)<sub>2</sub>**) in  $\text{CD}_3\text{CN}$ .

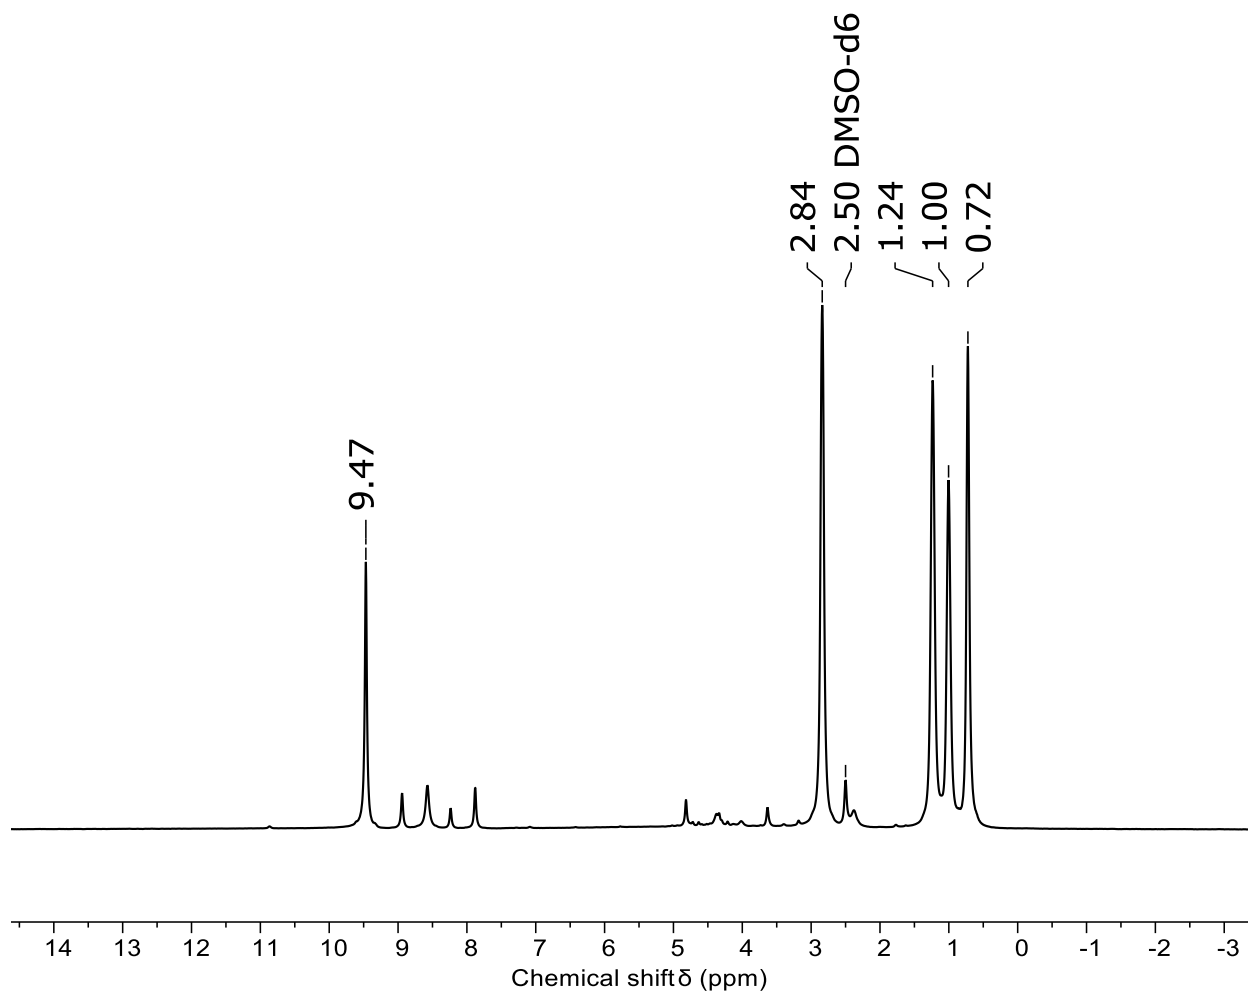

**Figure S11:**  $^1\text{H}$  NMR spectrum (500 MHz) of  $(\text{TBA})_2[\text{U}\{\text{Mo}_5\text{O}_{13}(\text{OMe})_4\text{NO}\}_2]$  (**5-U(Mo<sub>5</sub>)<sub>2</sub>**) in  $\text{DMSO-d}_6$ .

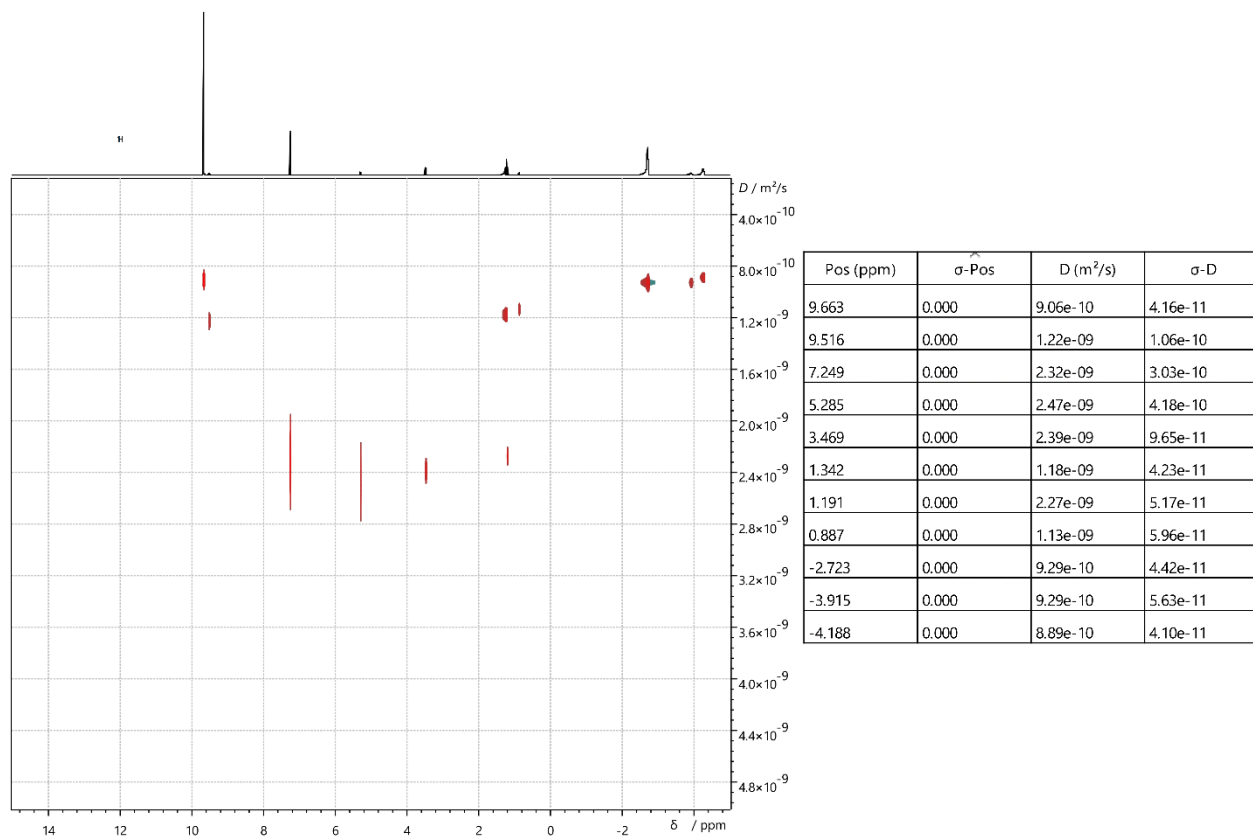

**Figure S12:** <sup>1</sup>H DOSY NMR spectrum (500 MHz) of a 2mM solution (TBA)<sub>2</sub>[U{Mo<sub>5</sub>O<sub>13</sub>(OMe)<sub>4</sub>NO}<sub>2</sub>] (**5-U(Mo<sub>5</sub>)<sub>2</sub>**) in CDCl<sub>3</sub>. The obtained diffusion coefficient (D in m<sup>2</sup>/s) for each peak in the <sup>1</sup>H NMR spectrum is given with the standard deviation ( $\sigma$ -D). The peaks at -2.723, -3.915, and -4.188 ppm can be assigned to the TBA cation, while the peak at 9.663 ppm is assigned to {U(Mo<sub>5</sub>)<sub>2</sub>} cluster.



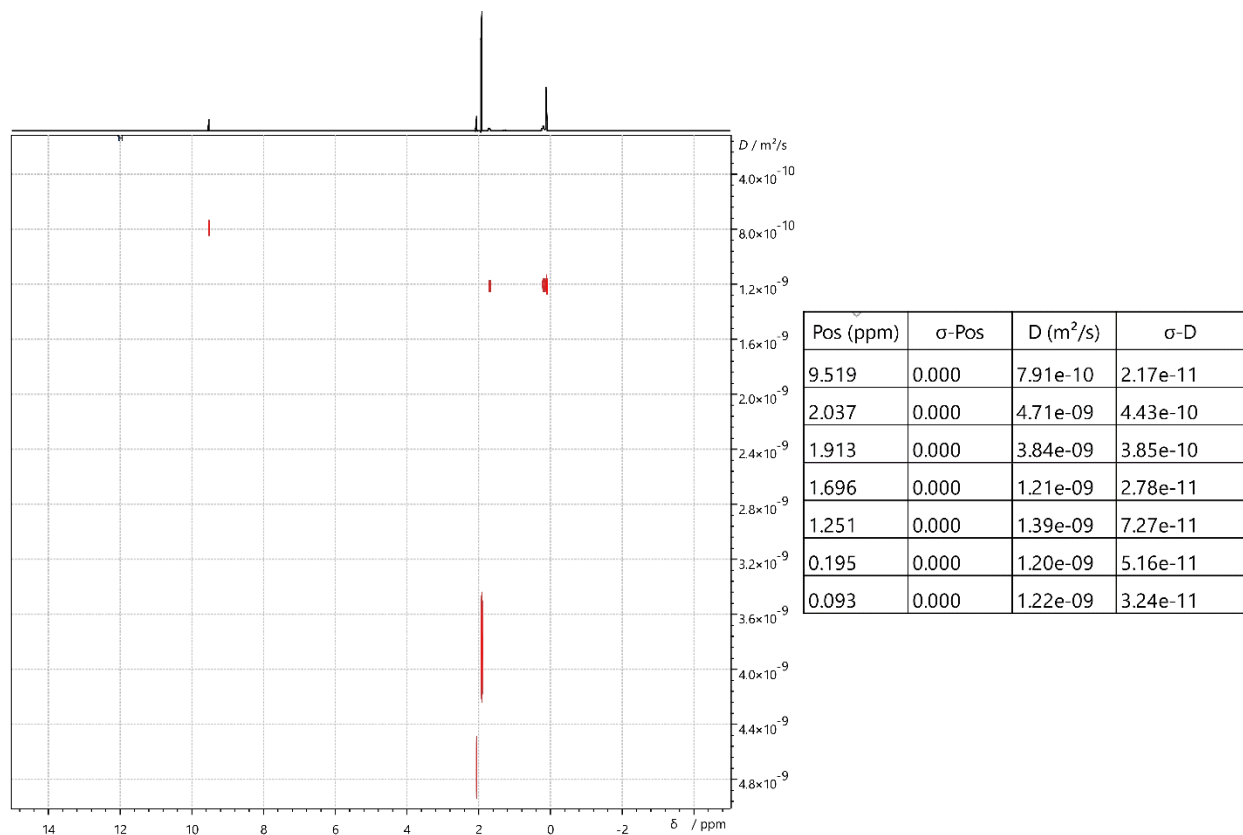

**Figure S13:** <sup>1</sup>H DOSY NMR spectrum (500 MHz) of a 2 mM solution of (TBA)<sub>2</sub>[U{Mo<sub>5</sub>O<sub>13</sub>(OMe)<sub>4</sub>NO}<sub>2</sub>] (**5-U(Mo<sub>5</sub>)<sub>2</sub>**) in CD<sub>3</sub>CN. The obtained diffusion coefficient (D in m<sup>2</sup>/s) for each peak in the <sup>1</sup>H NMR spectrum is given with the standard deviation ( $\sigma$ -D). The peaks at 0.093, 0.195, 1.251 and 1.696 ppm can be assigned to the TBA cation, while the peak at 9.519 ppm is assigned to {U(Mo<sub>5</sub>)<sub>2</sub>} cluster.

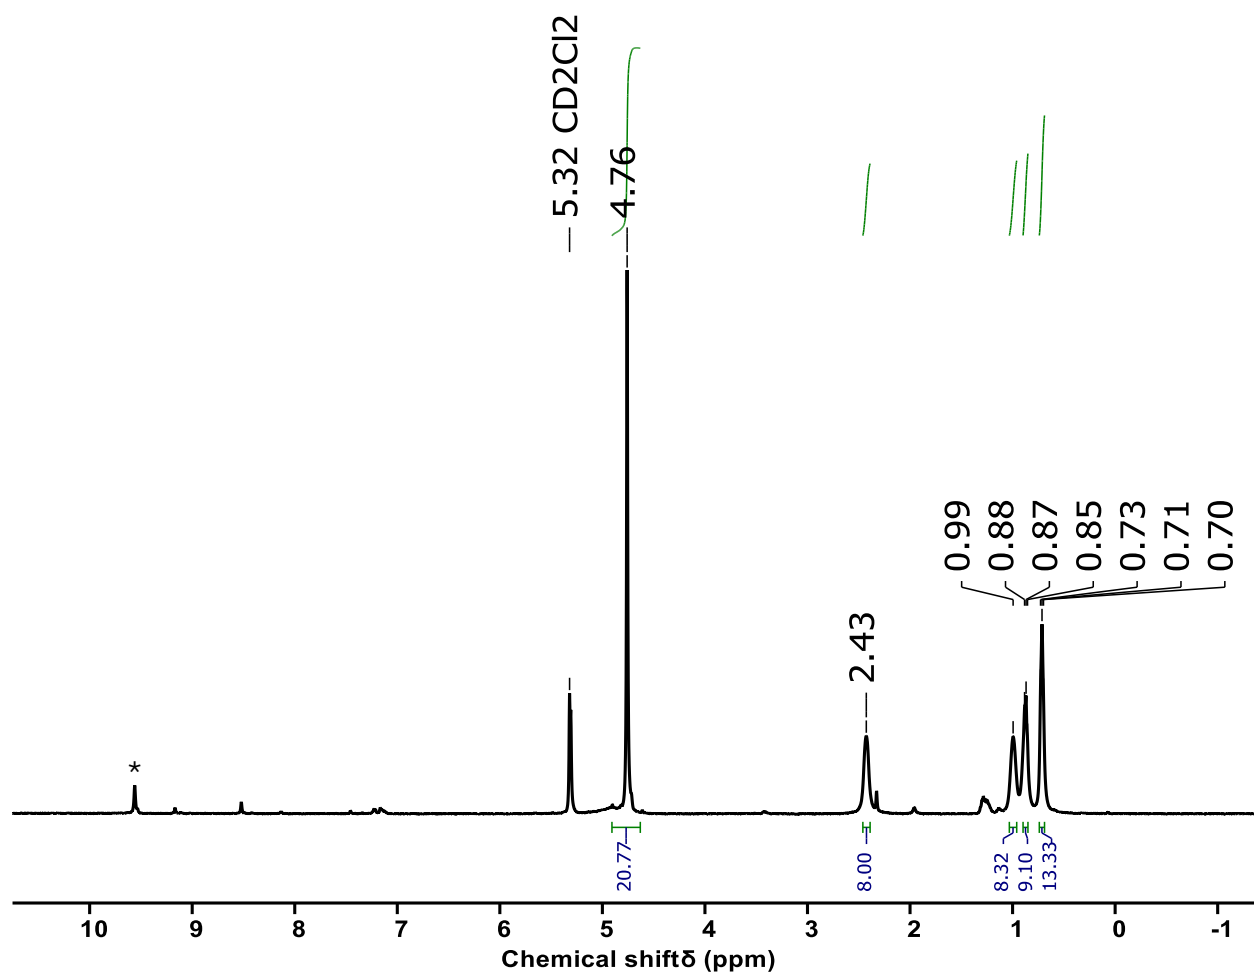

**Figure S14:**  $^1\text{H}$  NMR spectrum (500 MHz) of crude  $(\text{TBA})[\text{U}\{\text{Mo}_5\text{O}_{13}(\text{OMe})_4\text{NO}\}_2]$  (**6-U(Mo<sub>5</sub>)<sub>2</sub>**), obtained from oxidation of  $(\text{TBA})_2[\text{U}\{\text{Mo}_5\text{O}_{13}(\text{OMe})_4\text{NO}\}_2]$  (**5-U(Mo<sub>5</sub>)<sub>2</sub>**) with an excess of  $[\text{NO}][\text{PF}_6]$ . Spectrum recorded in  $\text{CD}_2\text{Cl}_2$ . The peak marked with an asterisk corresponds to the  $-\text{OMe}$  groups of **5-U(Mo<sub>5</sub>)<sub>2</sub>**.

## 2. Electronic absorption spectra

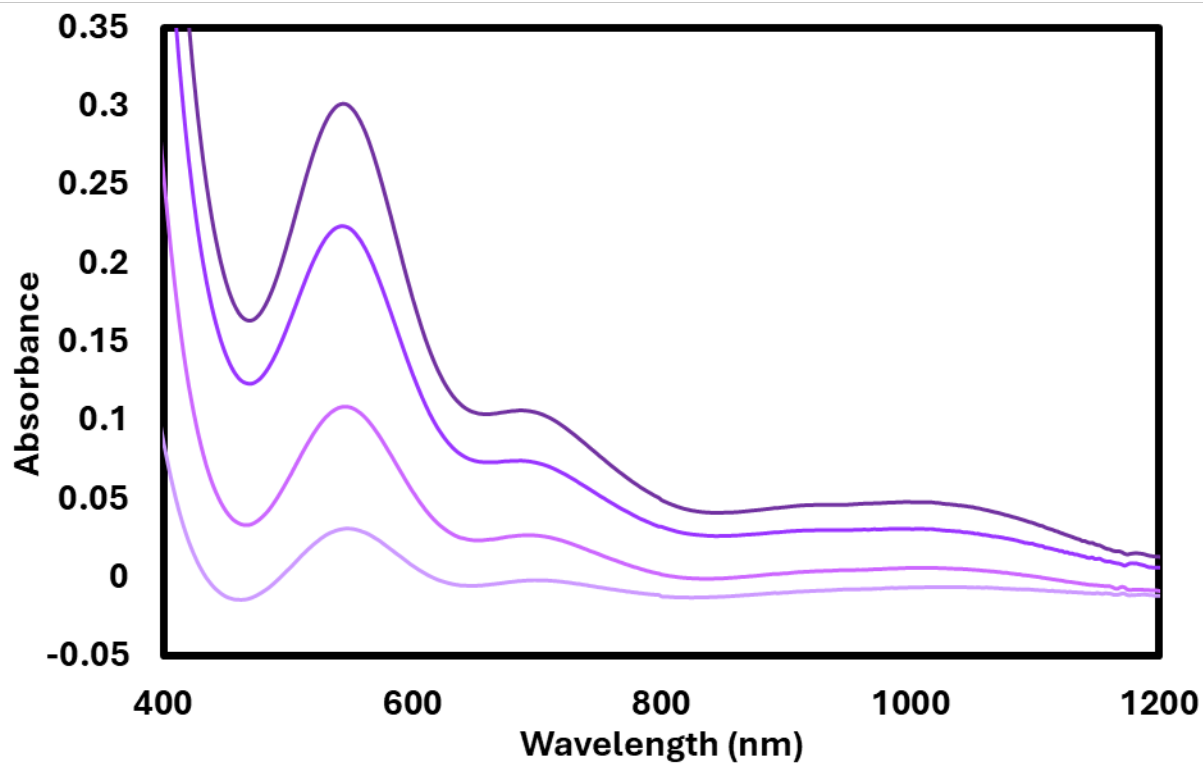

Figure S15: UV-Vis spectra of 1 mM, 2 mM, 3 mM, and 4 mM solutions **1-NaMo<sub>5</sub>** in MeCN.

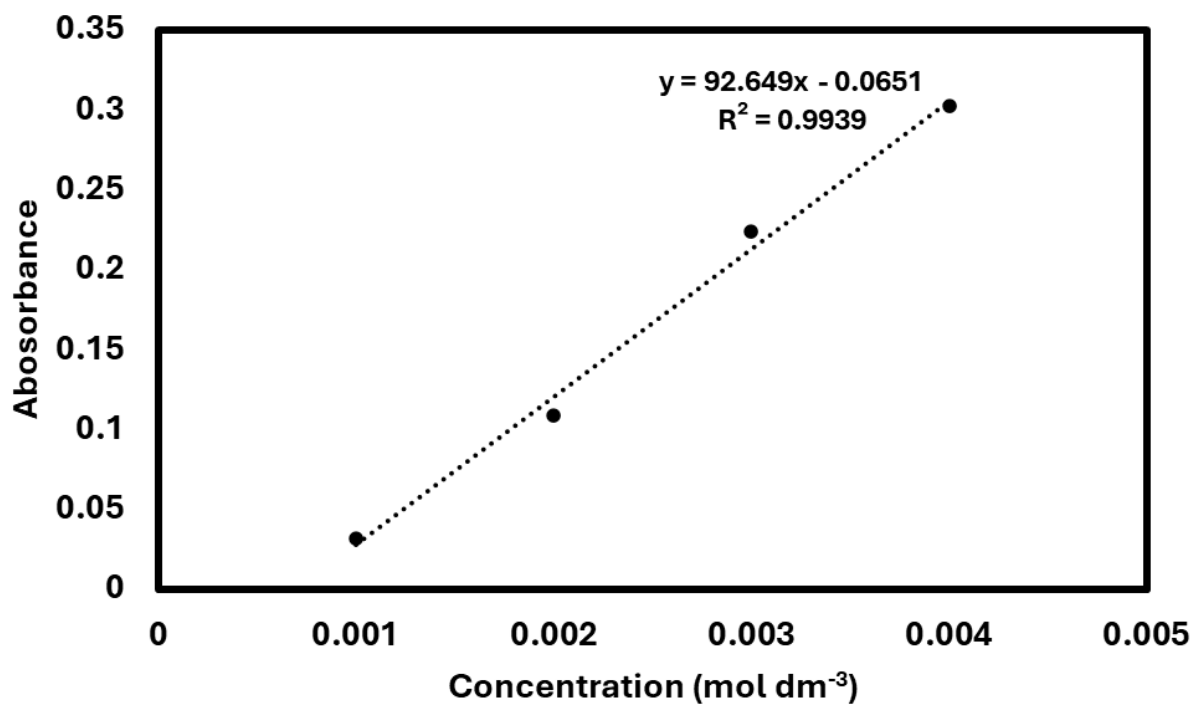

Figure S16: Conc. vs abs. plot at the  $\lambda_{\max}$  (546 nm) for **1-NaMo<sub>5</sub>** in MeCN.

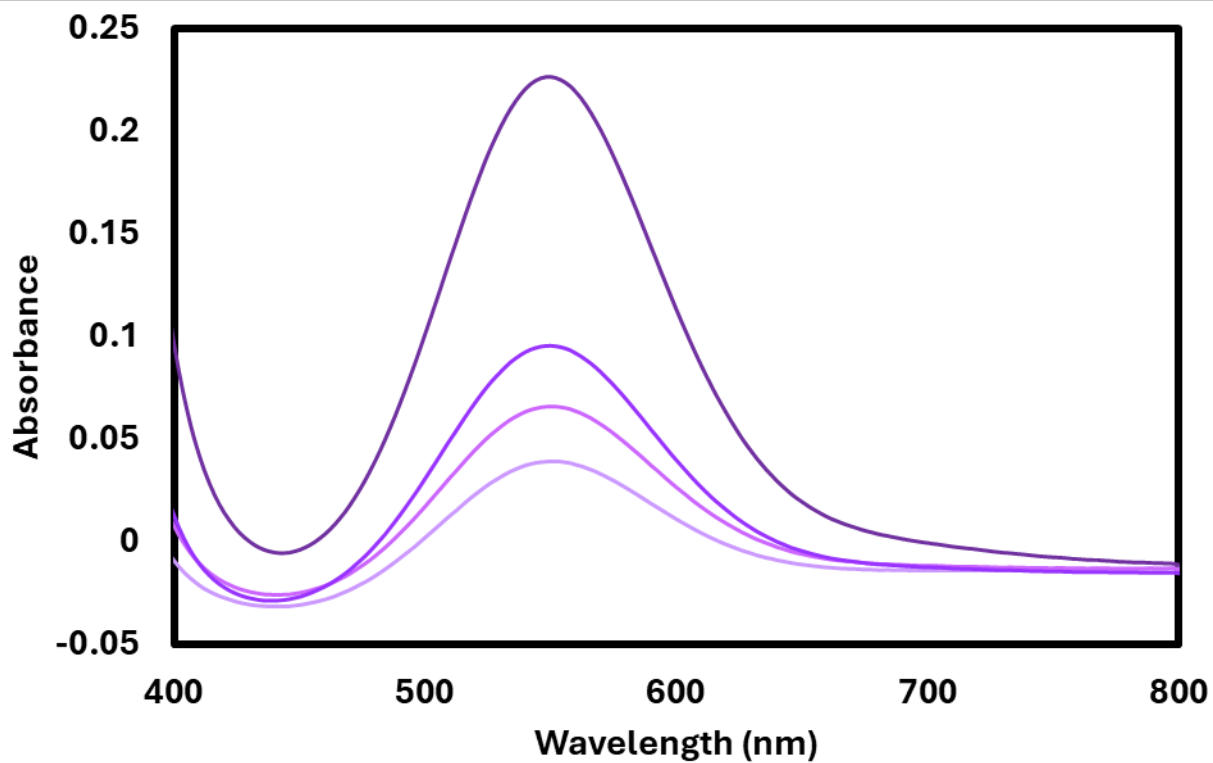

**Figure S17:** UV-Vis spectra of 0.5 mM, 0.75 mM, 1 mM, and 2 mM solutions of  $(\text{TBA})_4[\text{Ba}\{\text{Mo}_5\text{O}_{13}(\text{OMe})_4\text{NO}\}_2]$  in MeCN.

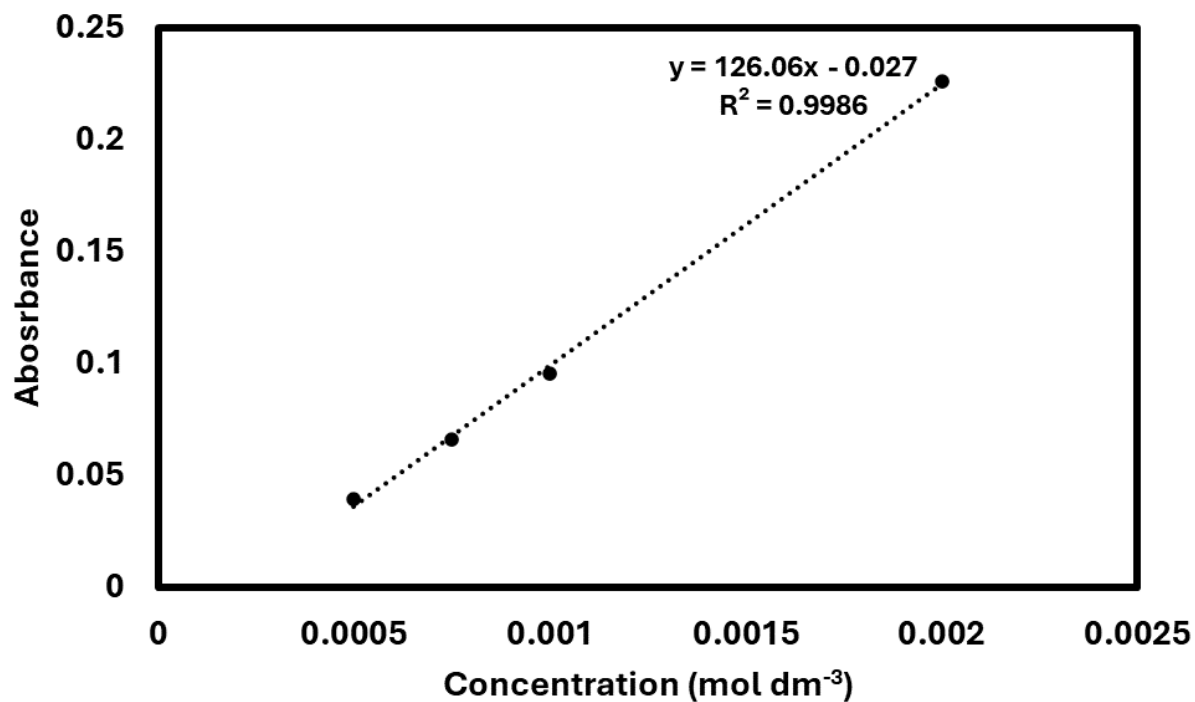

**Figure S18:** Conc. vs abs. plot at the  $\lambda_{\text{max}}$  (550 nm) for  $(\text{TBA})_4[\text{Ba}\{\text{Mo}_5\text{O}_{13}(\text{OMe})_4\text{NO}\}_2]$  in MeCN.

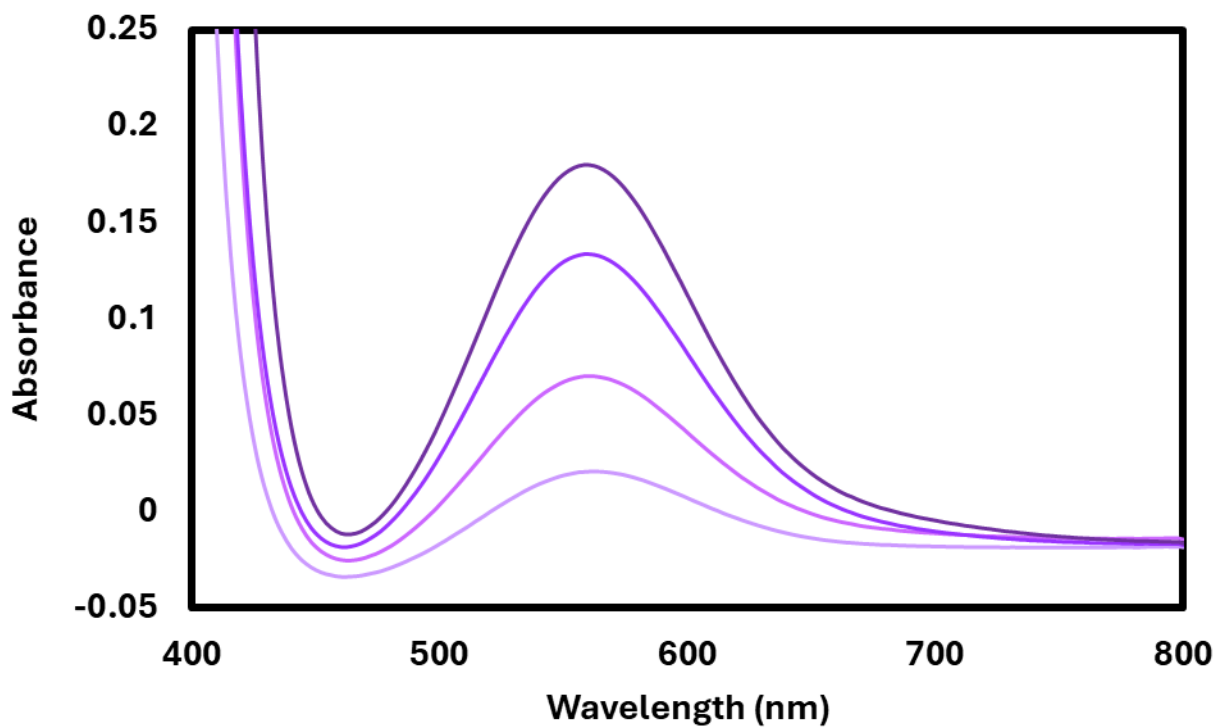

**Figure S19:** UV-Vis spectra of 0.5 mM, 1 mM, 1.5 mM, and 2 mM solutions of  $(\text{TBA})_3[\text{Bi}\{\text{Mo}_5\text{O}_{13}(\text{OMe})_4\text{NO}\}_2]$  in MeCN.

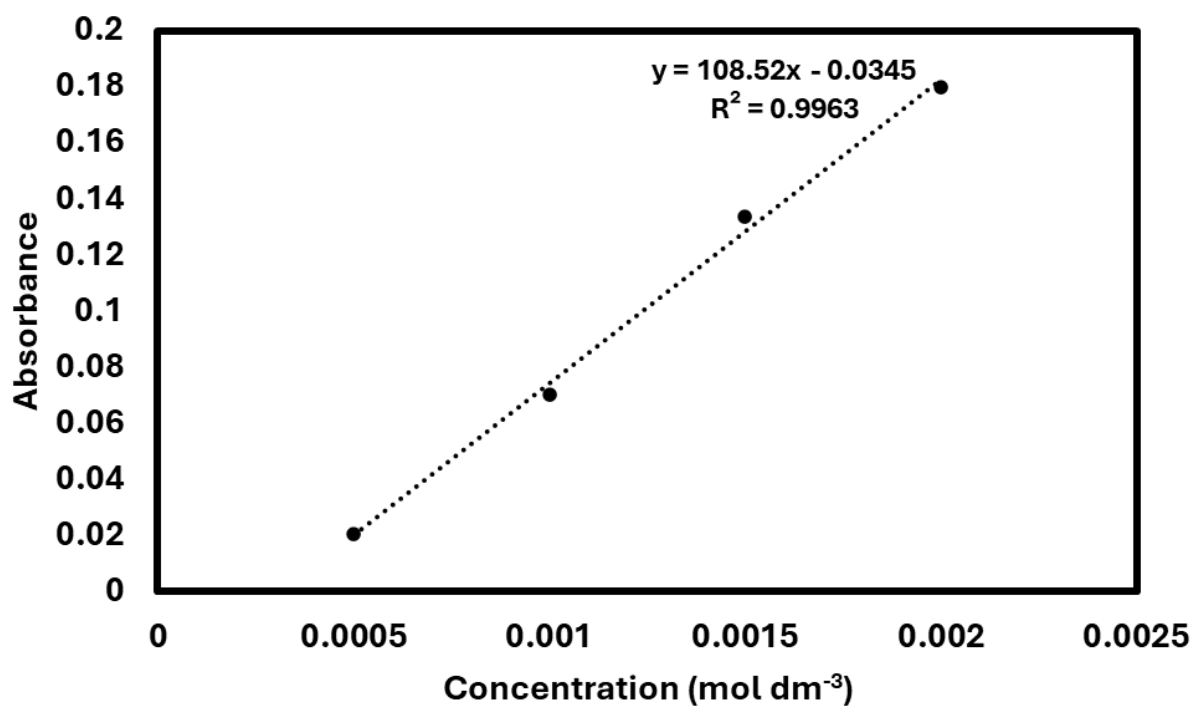

**Figure S20:** Conc. vs abs. plot at the  $\lambda_{\text{max}}$  (560 nm) for  $(\text{TBA})_3[\text{Bi}\{\text{Mo}_5\text{O}_{13}(\text{OMe})_4\text{NO}\}_2]$  in MeCN.

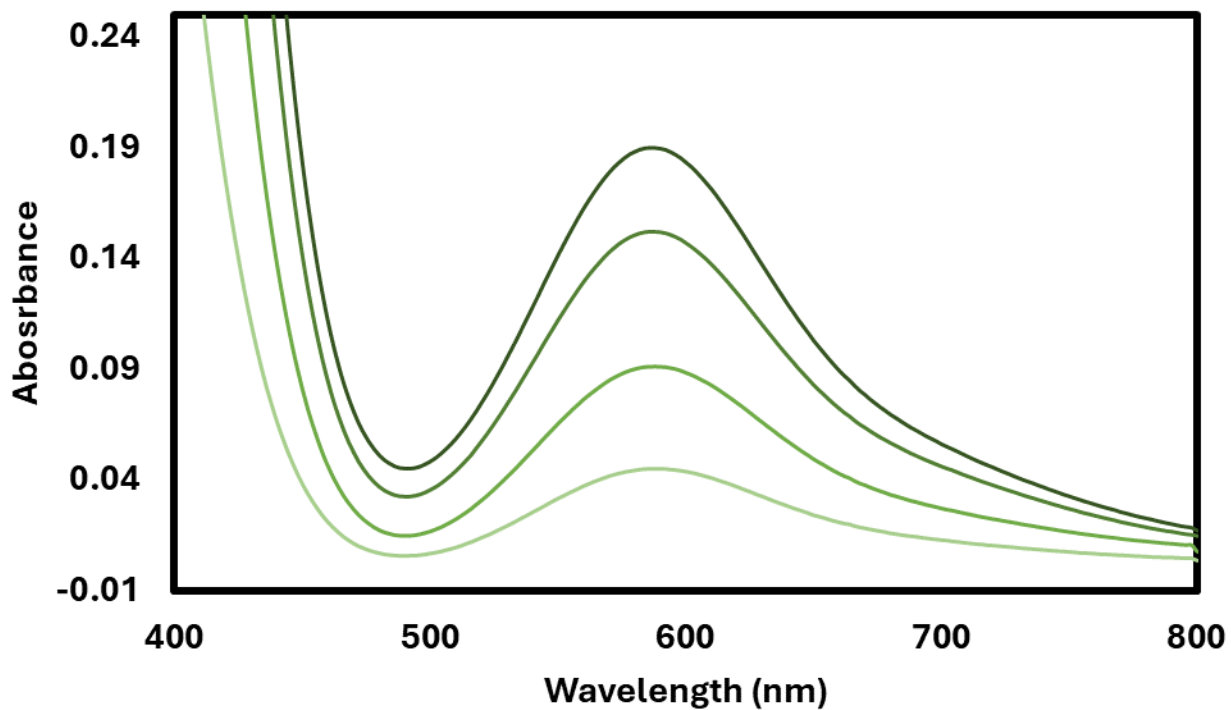

Figure S21: UV-Vis spectra of 0.5 mM, 1 mM, 1.5 mM, and 2 mM solutions of **2-Zr(Mo<sub>5</sub>)<sub>2</sub>** in MeCN.

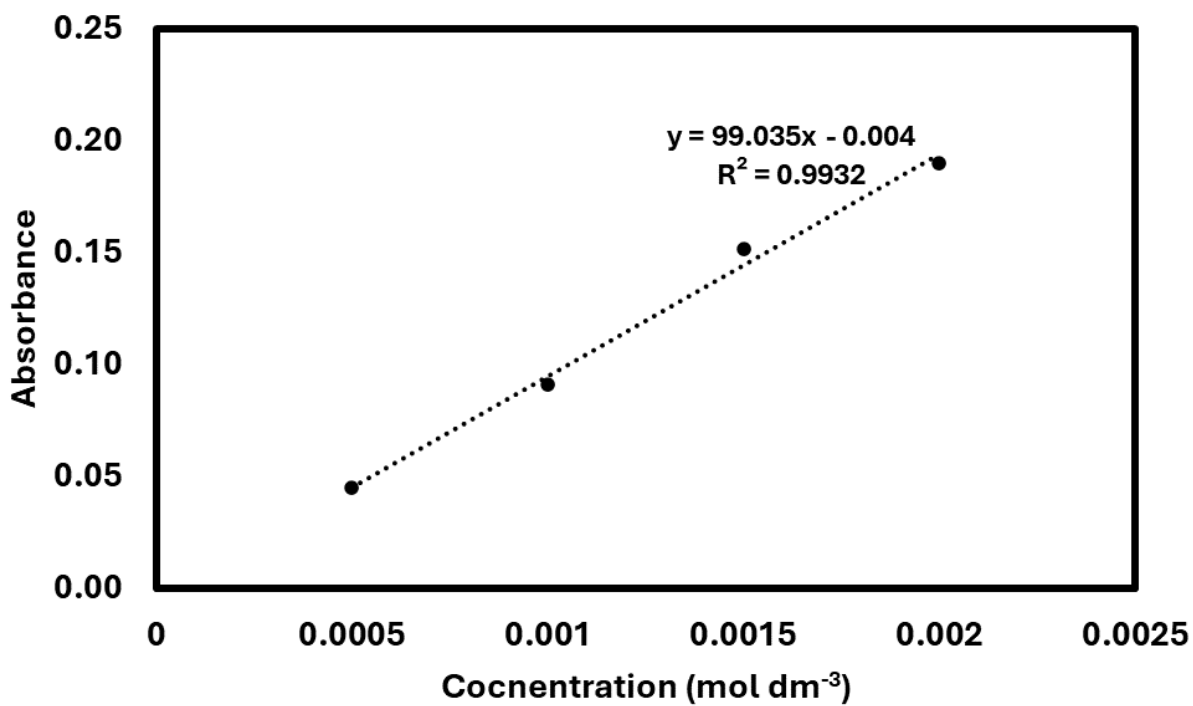

Figure S22: Conc. vs abs. plot at the  $\lambda_{\max}$  (588 nm) for **2-Zr(Mo<sub>5</sub>)<sub>2</sub>** in MeCN.

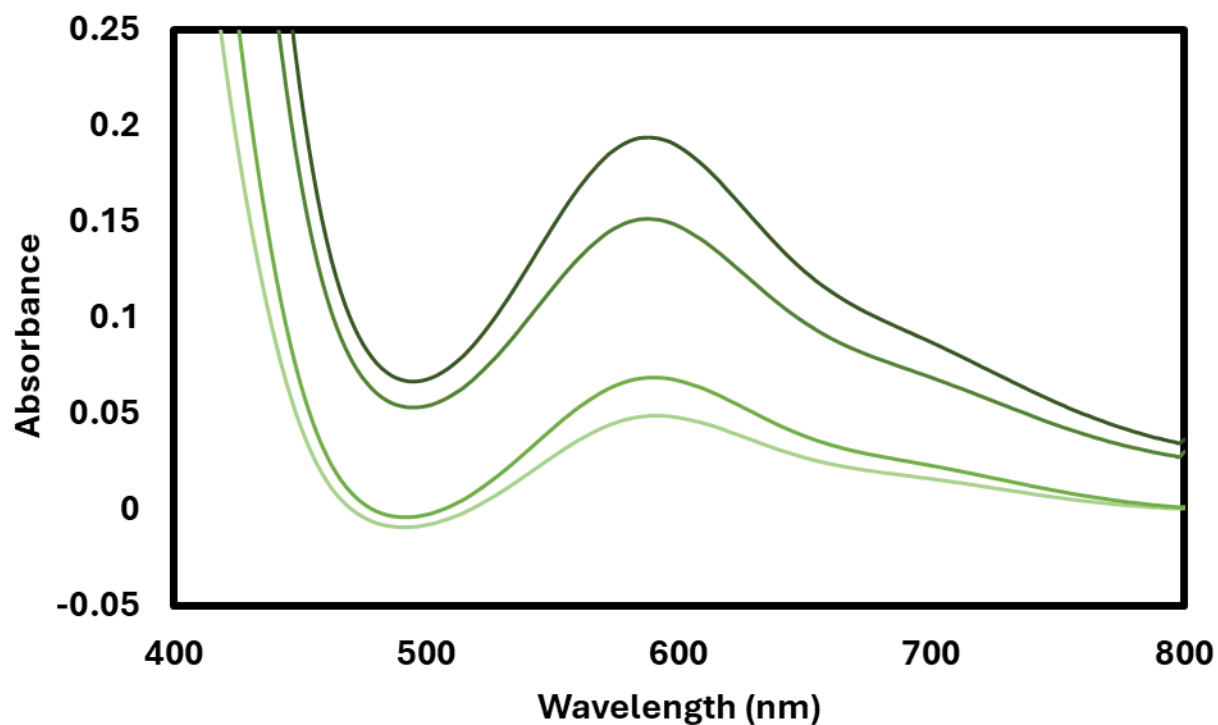

**Figure S23:** UV-Vis spectra of 0.75 mM, 1 mM, 1.5 mM, and 2 mM solutions of  $3\text{-Hf}(\text{Mo}_5)_2$  in MeCN.

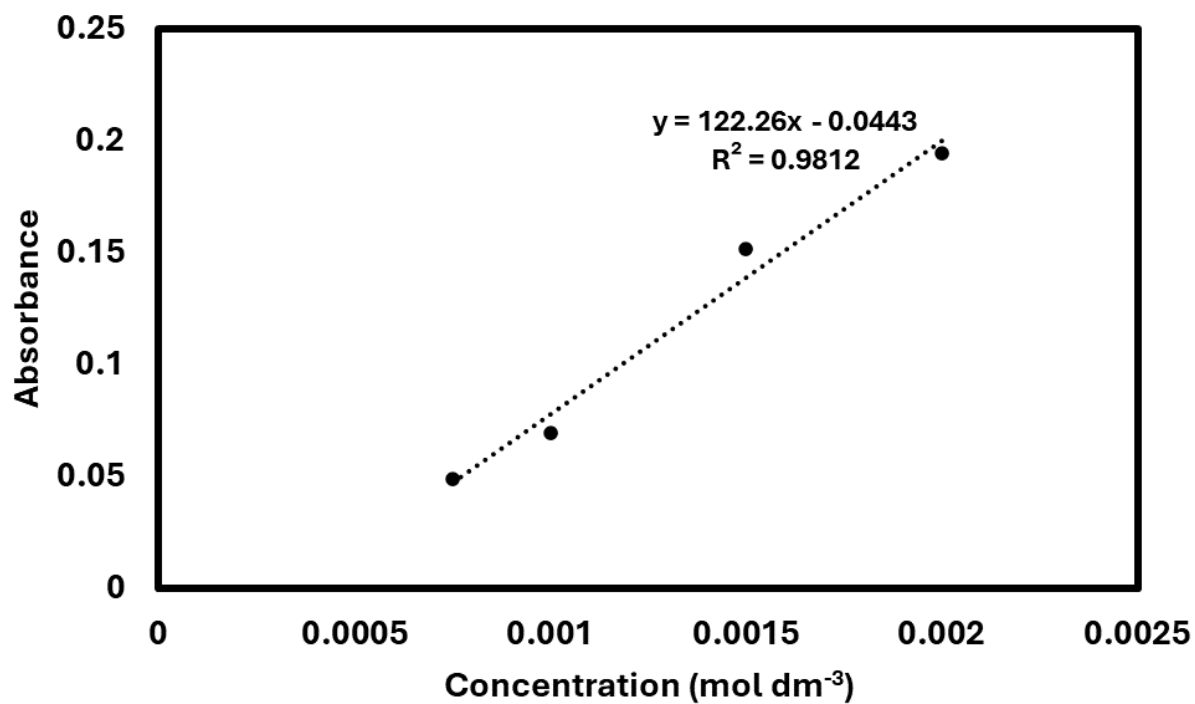

**Figure S24:** Conc. vs abs. plot at the  $\lambda_{\text{max}}$  (588 nm) for  $3\text{-Hf}(\text{Mo}_5)_2$  in MeCN.

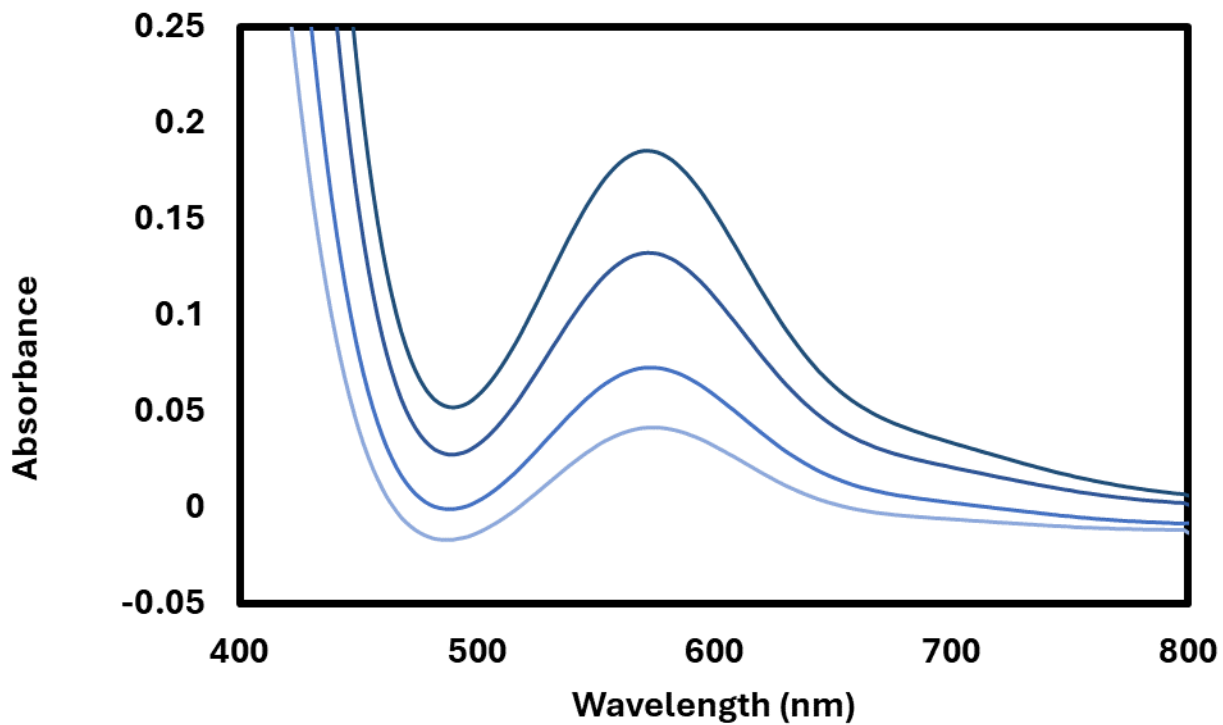

**Figure S25:** UV-Vis spectra of 0.75 mM, 1 mM, 1.5 mM, and 2 mM solutions of **4-Th(Mo<sub>5</sub>)<sub>2</sub>** in MeCN.

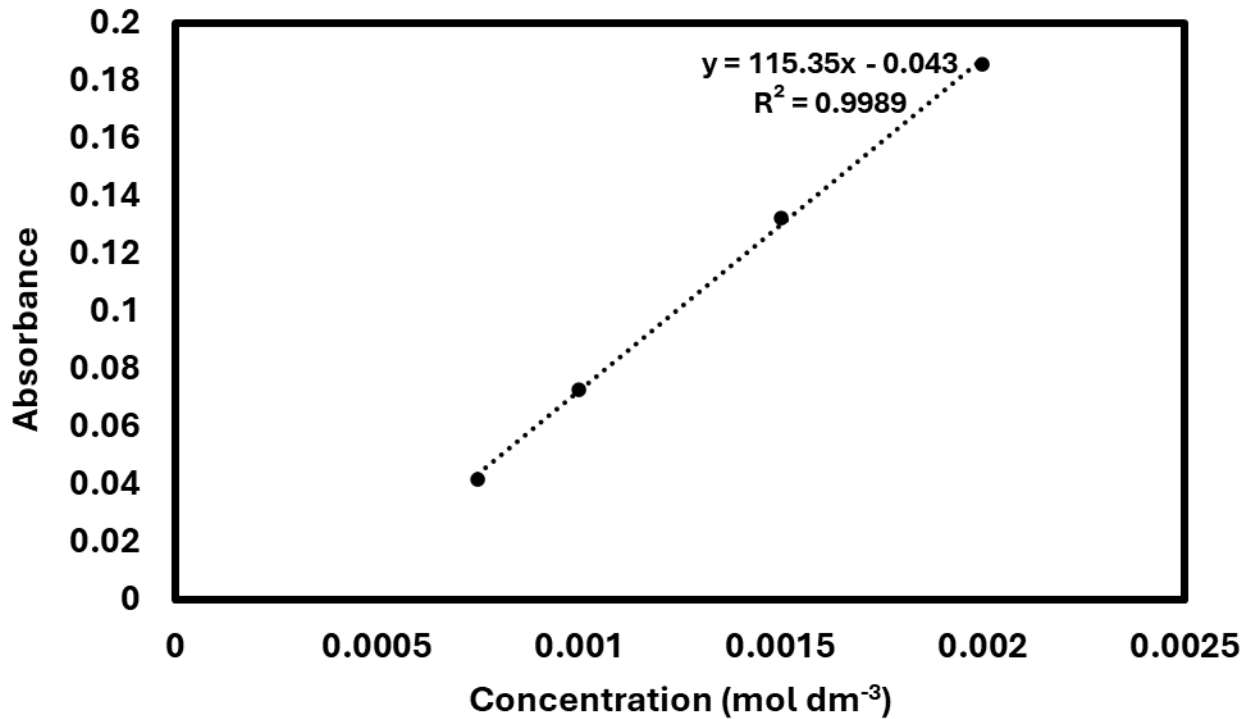

**Figure S26:** Conc. vs abs. plot at the  $\lambda_{\text{max}}$  (572 nm) for **4-Th(Mo<sub>5</sub>)<sub>2</sub>** in MeCN.



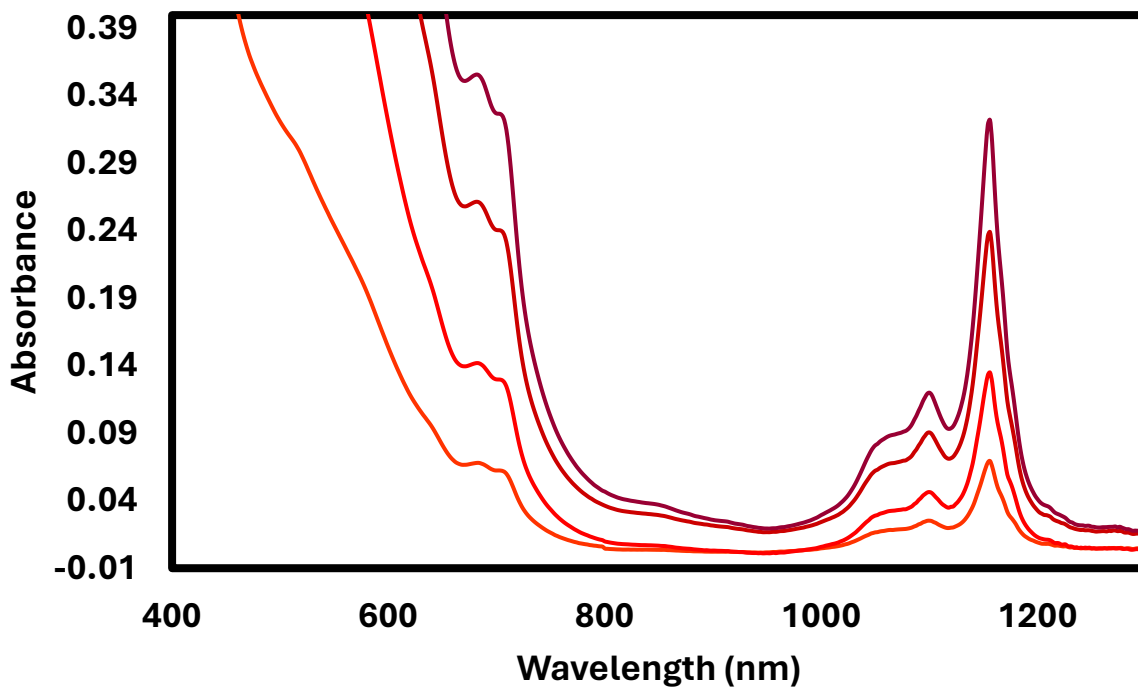

Figure S27: UV-Vis spectra of 0.5 mM, 1 mM, 1.5 mM, and 2 mM solutions of **5-U(Mo<sub>5</sub>)<sub>2</sub>** in MeCN.

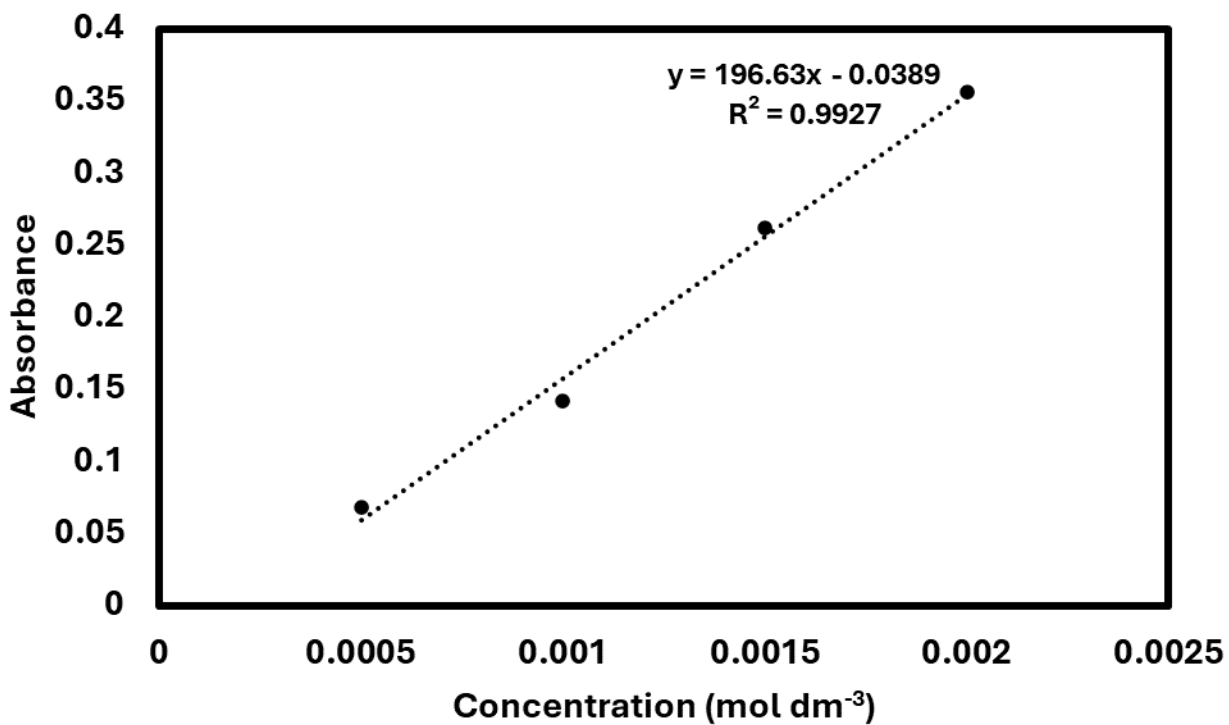

Figure S28: Conc. vs abs. plot for the *f-f* transition at 682 nm of **5-U(Mo<sub>5</sub>)<sub>2</sub>** in MeCN.

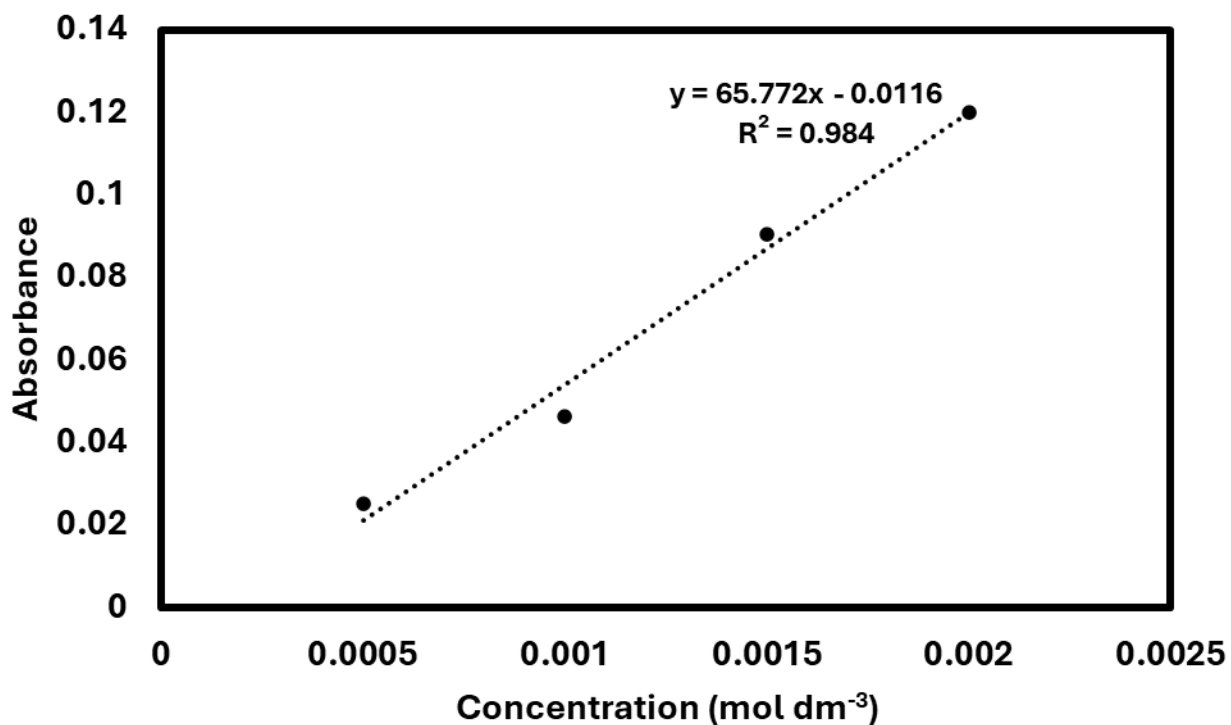

Figure S29: Conc. vs abs. plot for the *f-f* transition at 1100 nm of 5-U(Mo<sub>5</sub>)<sub>2</sub> in MeCN.

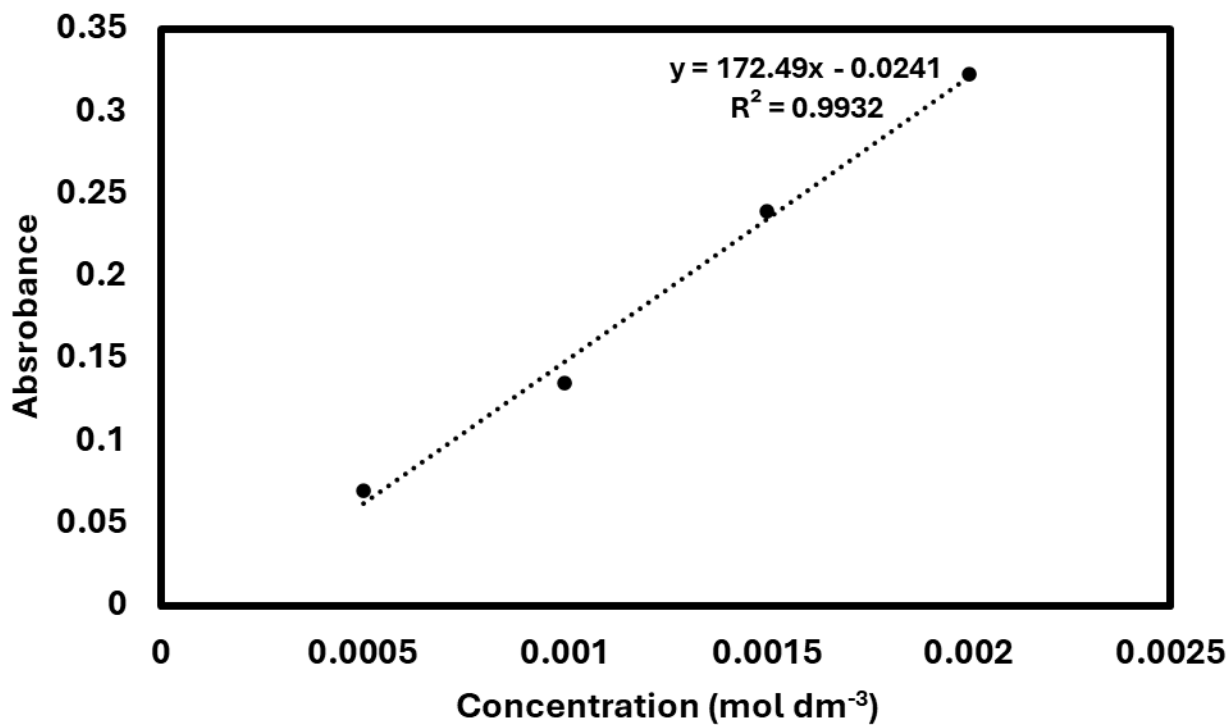

Figure S30: Conc. vs abs. plot for the *f-f* transition at 1156 nm of 5-U(Mo<sub>5</sub>)<sub>2</sub> in MeCN.

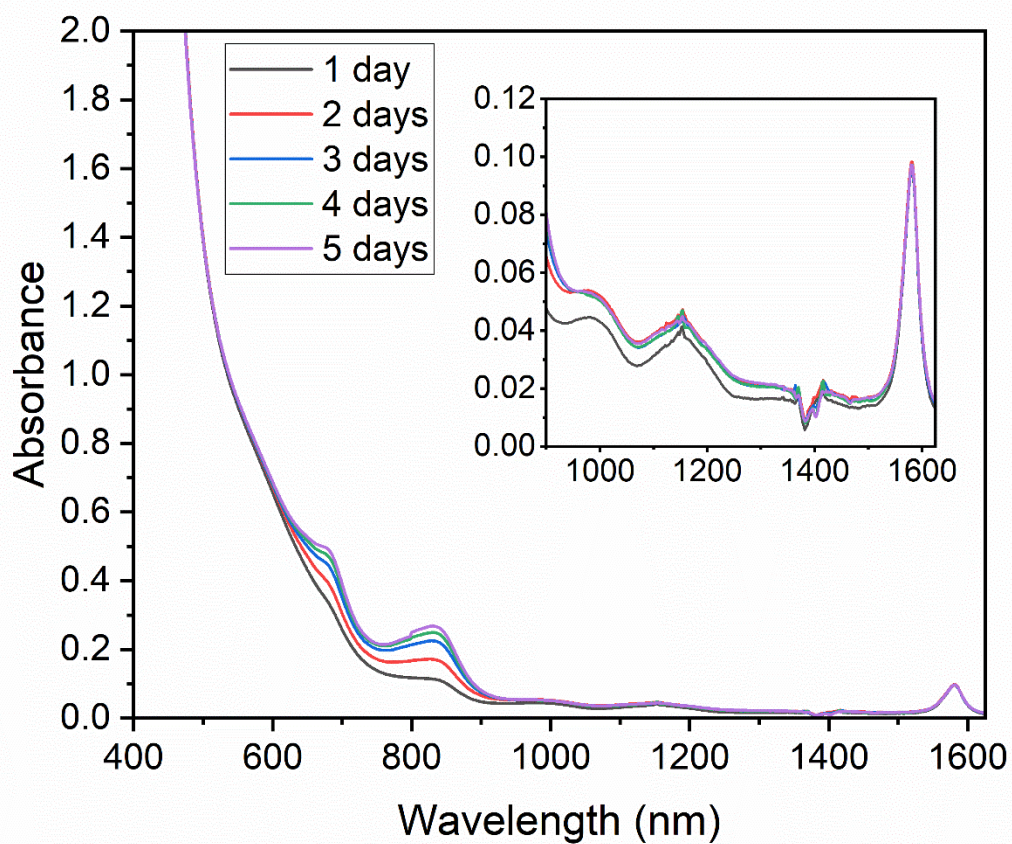

**Figure S31:** UV-Vis/NIR spectra of  $6\text{-U}(\text{Mo}_5)_2$  in DCM at room temperature (21 °C) recorded every day for 5 days. The solution was sealed in a screw-top quartz cuvette and was assumed to be protected from air and moisture.

### 3. Single crystal X-ray diffraction information

**Table S1:** Crystallographic parameters for **2-Zr(Mo<sub>5</sub>)<sub>2</sub>** and **3-Hf(Mo<sub>5</sub>)<sub>2</sub>**

|                                   | <b>2-Zr(Mo<sub>5</sub>)<sub>2</sub></b>                                                         | <b>3-Hf(Mo<sub>5</sub>)<sub>2</sub></b>                                                            |
|-----------------------------------|-------------------------------------------------------------------------------------------------|----------------------------------------------------------------------------------------------------|
| Empirical formula                 | C <sub>45.10</sub> H <sub>106.75</sub> Mo <sub>10</sub> N <sub>5</sub> O <sub>36.78</sub> Zr    | C <sub>45.13</sub> H <sub>106.82</sub> HfMo <sub>10</sub> N <sub>5</sub> O <sub>36.78</sub>        |
| Formula weight                    | 2358.35                                                                                         | 2446.14                                                                                            |
| Temperature                       | 100.00(10) K                                                                                    | 100.00(10) K                                                                                       |
| Wavelength                        | 0.71073 Å                                                                                       | 0.71073 Å                                                                                          |
| Crystal system                    | Monoclinic                                                                                      | Monoclinic                                                                                         |
| Space group                       | P2 <sub>1/c</sub>                                                                               | P2 <sub>1/c</sub>                                                                                  |
| Unit cell dimensions              | a = 21.4037(2) Å<br>b = 15.0940(2) Å<br>c = 24.2093 Å<br>α = 90°<br>β = 92.6550(10)°<br>γ = 90° | a = 21.3965(2) Å<br>b = 15.0939(2) Å<br>c = 24.2325(3) Å<br>α = 90°<br>β = 92.6250(10)°<br>γ = 90° |
| Volume                            | 7812.84(16) Å <sup>3</sup>                                                                      | 7817.83(16) Å <sup>3</sup>                                                                         |
| Z                                 | 4                                                                                               | 4                                                                                                  |
| Reflections collected             | 147354                                                                                          | 148392                                                                                             |
| Independent reflections           | 26637                                                                                           | 26606                                                                                              |
| Goodness-of-fit on F <sup>2</sup> | 1.046                                                                                           | 1.025                                                                                              |
| Final R indices<br>[I > 2σ(I)]    | R1 = 0.0445<br>wR2 = 0.0891                                                                     | R1 = 0.0394<br>wR2 = 0.0779                                                                        |

**Table S2:** Crystallographic parameters for **4-Th(Mo<sub>5</sub>)<sub>2</sub>** and **5-U(Mo<sub>5</sub>)<sub>2</sub>**

|                                   | <b>4-Th(Mo<sub>5</sub>)<sub>2</sub></b>                                                                        | <b>5-U(Mo<sub>5</sub>)<sub>2</sub></b>                                                           |
|-----------------------------------|----------------------------------------------------------------------------------------------------------------|--------------------------------------------------------------------------------------------------|
| Empirical formula                 | C <sub>42</sub> H <sub>99</sub> Mo <sub>10</sub> N <sub>5</sub> O <sub>36</sub> Th                             | C <sub>45.75</sub> H <sub>108</sub> Mo <sub>10</sub> N <sub>5</sub> O <sub>36</sub> U            |
| Formula weight                    | 2441.70                                                                                                        | 2501.80                                                                                          |
| Temperature                       | 100K                                                                                                           | 100 K                                                                                            |
| Wavelength                        | 0.56087 Å                                                                                                      | 0.56087 Å                                                                                        |
| Crystal system                    | Triclinic                                                                                                      | Monoclinic                                                                                       |
| Space group                       | <i>P</i> -1                                                                                                    | <i>P</i> 2 <sub>1/c</sub>                                                                        |
| Unit cell dimensions              | a = 12.8161(2) Å<br>b = 15.4649(2) Å<br>c = 19.9194(3) Å<br>α = 87.176(1)°<br>β = 84.075(1)°<br>γ = 73.714(1)° | a = 21.7821(5) Å<br>b = 15.0682(4) Å<br>c = 24.1223(6) Å<br>α = 90°<br>β = 92.925(2)°<br>γ = 90° |
| Volume                            | 3768.50(10) Å <sup>3</sup>                                                                                     | 7907.0(3) Å <sup>3</sup>                                                                         |
| Z                                 | 2                                                                                                              | 4                                                                                                |
| Reflections collected             | 27268                                                                                                          | 17419                                                                                            |
| Independent reflections           | 22524                                                                                                          | 12760                                                                                            |
| Goodness-of-fit on F <sup>2</sup> | 1.040                                                                                                          | 1.061                                                                                            |
| Final R indices<br>[I > 2σ(I)]    | R1 = 0.0252<br>wR2 = 0.0530                                                                                    | R1 = 0.0450<br>wR2 = 0.1141                                                                      |

**Table S3:** Crystallographic parameters for **6-U(Mo<sub>5</sub>)<sub>2</sub>**

|                                   | <b>6-U(Mo<sub>5</sub>)<sub>2</sub></b>                                                                     |
|-----------------------------------|------------------------------------------------------------------------------------------------------------|
| Empirical formula                 | C <sub>26.61</sub> H <sub>65.22</sub> Cl <sub>5.22</sub> Mo <sub>10</sub> N <sub>3</sub> O <sub>36</sub> U |
| Formula weight                    | 2385.74                                                                                                    |
| Temperature                       | 100.00(10) K                                                                                               |
| Wavelength                        | 1.54184 Å                                                                                                  |
| Crystal system                    | Monoclinic                                                                                                 |
| Space group                       | P2 <sub>1/n</sub>                                                                                          |
| Unit cell dimensions              | a = 16.31000(10) Å<br>b = 21.22060(10) Å<br>c = 18.90170(10) Å<br>α = 90°<br>β = 103.3130(10)°<br>γ = 90°  |
| Volume                            | 6366.22(6) Å <sup>3</sup>                                                                                  |
| Z                                 | 4                                                                                                          |
| Reflections collected             | 109066                                                                                                     |
| Independent reflections           | 13749                                                                                                      |
| Goodness-of-fit on F <sup>2</sup> | 1.093                                                                                                      |
| Final R indices<br>[I > 2σ(I)]    | R1 = 0.0389<br>wR2 = 0.1028                                                                                |

**Table S4:** Average bond length data for the structures discussed. All values in Å. A schematic is given below to highlight bond assignments.

|                                       | 2-Zr(Mo <sub>5</sub> ) <sub>2</sub> | 3-Hf(Mo <sub>5</sub> ) <sub>2</sub> | 4-Th(Mo <sub>5</sub> ) <sub>2</sub> | 5-U(Mo <sub>5</sub> ) <sub>2</sub> | 6-U(Mo <sub>5</sub> ) <sub>2</sub> |
|---------------------------------------|-------------------------------------|-------------------------------------|-------------------------------------|------------------------------------|------------------------------------|
| <b>Mo-O-Mo (eq)</b>                   | 1.911                               | 1.911                               | 1.904                               | 1.905                              | 1.914                              |
| <b>Mo-O-Mo (ax)</b>                   | 2.200                               | 2.202                               | 2.204                               | 2.194                              | 2.172                              |
| <b>Mo(II)-O</b>                       | 2.009                               | 2.009                               | 2.002                               | 2.002                              | 2.015                              |
| <b>Mo-O-M</b>                         | 1.774                               | 1.774                               | 1.773                               | 1.778                              | 1.803                              |
| <b>M-O</b>                            | 2.201                               | 2.191                               | 2.410                               | 2.358                              | 2.277                              |
| <b>Mo=O</b>                           | 1.690                               | 1.690                               | 1.693                               | 1.690                              | 1.681                              |
| <b>Mo-O(μ<sub>5</sub>) (eq)</b>       | 2.312                               | 2.311                               | 2.323                               | 2.323                              | 2.321                              |
| <b>Mo-O(μ<sub>5</sub>) (ax)</b>       | 2.093                               | 2.091                               | 2.124                               | 2.117                              | 2.111                              |
| <b>M<sub>5</sub>O- μ<sub>5</sub>O</b> | 6.652                               | 6.643                               | 6.940                               | 6.843                              | 6.749                              |
| <b>O-O</b>                            | 2.751                               | 2.751                               | 3.105                               | 3.012                              | 2.889                              |
| <b>Mo-NO</b>                          | 1.773                               | 1.773                               | 1.776                               | 1.768                              | 1.768                              |

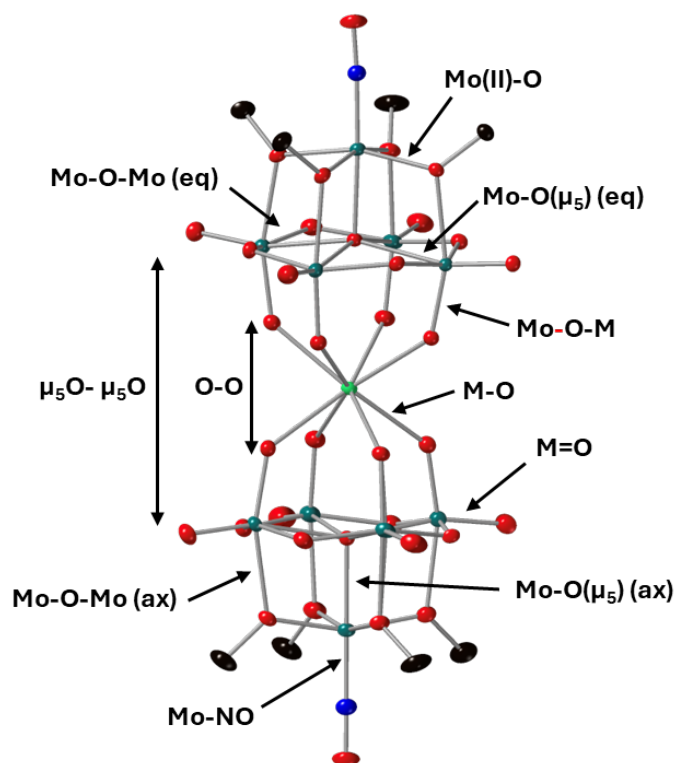

### Calculation of U<sup>5+</sup> ionic radius:

**Method 1:** Average value obtained from subtraction of O<sup>2-</sup> ionic radius (1.35 Å)<sup>1</sup> from U-O bond lengths.

| U-O bond lengths | O <sup>2-</sup> ionic radius | Calc. U ionic radius |
|------------------|------------------------------|----------------------|
| 2.232            | 1.35                         | 0.882                |
| 2.234            |                              | 0.884                |
| 2.36             |                              | 1.01                 |
| 2.285            |                              | 0.935                |
| 2.341            |                              | 0.991                |
| 2.307            |                              | 0.957                |
| 2.205            |                              | 0.855                |
| 2.254            |                              | 0.904                |
|                  |                              | <b>0.92725</b>       |

**Method 2:** BVS analysis was performed on **6-U(Mo<sub>5</sub>)<sub>2</sub>**. The bond valence sum for the U center was calculated according to previously reported methods<sup>2</sup>, using the equations shown below, where  $V_j$  is the valence of the  $j$ th atom or ion,  $v_{ij}$  is the bond valence contribution from the “bond” between the  $i$ th and  $j$ th atom/ion,  $R_{ij}$  is a constant (here it is taken as 2.0935, the average of the U<sup>IV</sup> and U<sup>VI</sup> bond valence parameters given in ref. 2) that is dependent on the  $ij$  pair,  $d_{ij}$  is the observed bond length and  $b$  is 0.37.<sup>3</sup>

$$V_i = \sum_j v_{ij} \quad (1)$$

$$v_{ij} = \exp \left[ \frac{(R_{ij} - d_{ij})}{b} \right] \quad (2)$$

| U-O   | e $[(R_{ij} - d_{ij})/B]$ | BVS ( $V_i$ ) |
|-------|---------------------------|---------------|
| 2.232 | 0.68775382                | 4.916087      |
| 2.234 | 0.68404626                |               |
| 2.36  | 0.48662072                |               |
| 2.285 | 0.59596844                |               |
| 2.341 | 0.51226208                |               |
| 2.307 | 0.56156541                |               |
| 2.205 | 0.73981779                |               |
| 2.254 | 0.64805236                |               |

A single average bond length ( $d_{ij}$ ) was then back calculated by re-arrangement of equation 3 to give equation 4.



$$R_{ij} = b \ln \left[ \frac{V_i}{\sum_j \exp \left( -\frac{d_{ij}}{b} \right)} \right] \quad (3)$$

$$\sum_j \exp \left( -\frac{d_{ij}}{b} \right) = \frac{V_i}{\exp \left( \frac{R_{ij}}{b} \right)} \quad (4)$$

Plugging in values of  $R_{ij} = 2.0945$ ,  $b = 0.37$  and  $V_i = 4.916087$  (from BVS calculations) gives:

$$\sum_j \exp \left( -\frac{d_{ij}}{b} \right) = 0.017153 \quad (5)$$

The co-ordination number is 8, so the summation is eight instances:

$$\exp \left( -\frac{d_{ij}}{b} \right) = \frac{0.017153}{8} = 0.002144 \quad (6)$$

And therefore  $d_{ij} = 2.273664$ . Subtracting the ionic radius of  $O^{2-}$  ( $1.35 \text{ \AA}$ )<sup>1</sup> gives an effective ionic radius for the eight co-ordinate  $U^{5+}$  center of  $0.9236664 \text{ \AA}$

Averaging the values obtained by method 1 and 2 gives  $0.925457 \text{ \AA}$ , rounded to  $0.93 \text{ \AA}$ .

References:

1. R. D. Shannon, *Acta Crystallogr. Sect. A: Found. Crystallogr.*, 1976, **32**, 751-767.
2. N. E. Brese and M. O'Keeffe, *Acta Crystallogr. Sect. B*, 1991, **47**, 192-197.
3. I. D. Brown and D. Altermatt, *Acta Crystallogr. Sect. B*, 1985, **41**, 244-247.

#### 4. Electrochemistry

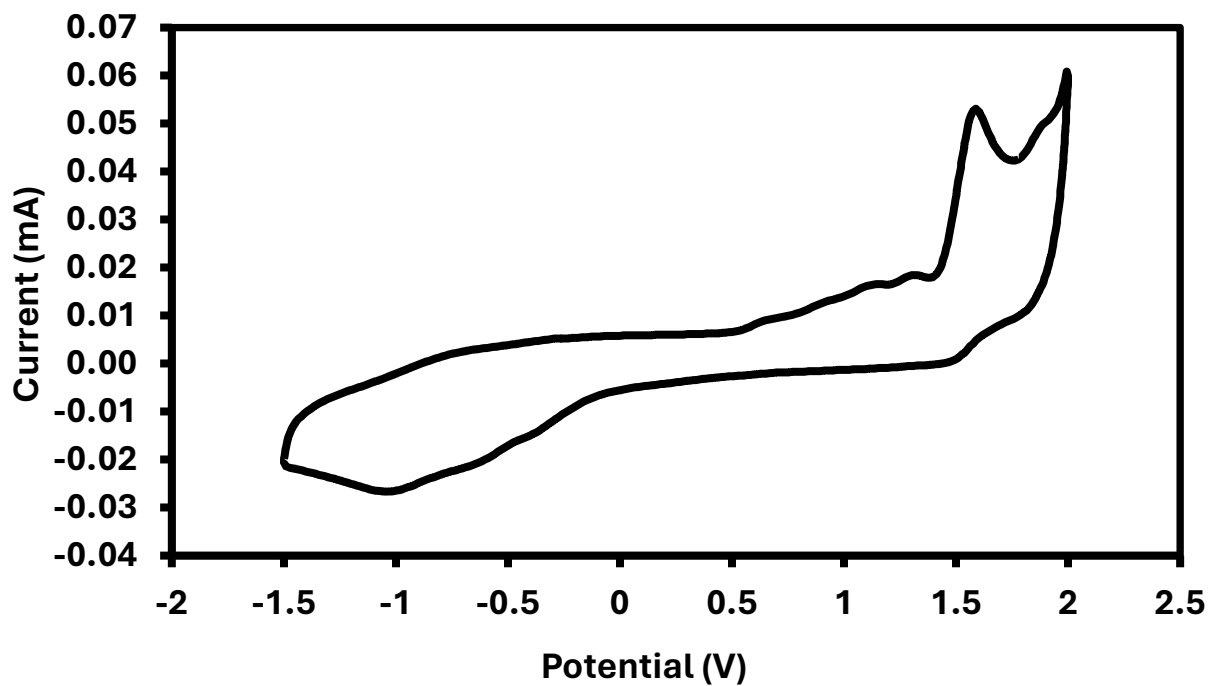

**Figure S32:** CV of  $(\text{TBA})_4[\text{Ba}\{\text{Mo}_5\text{O}_{13}(\text{OMe})_4\text{NO}\}_2]$  (1 mM) in MeCN (0.1 M TBA(PF<sub>6</sub>)). Scan rate = 200 mv/s.

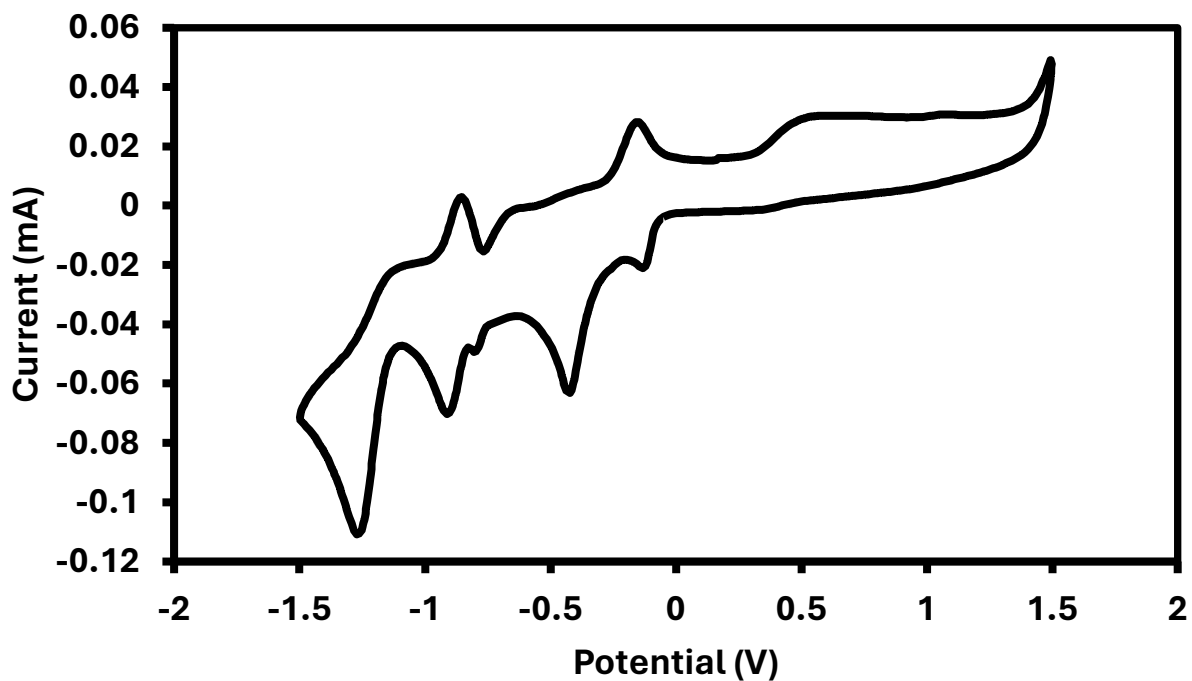

**Figure S33:** CV of  $(\text{TBA})_3[\text{Bi}\{\text{Mo}_5\text{O}_{13}(\text{OMe})_4\text{NO}\}_2]$  (1 mM) in MeCN (0.1 M TBA(PF<sub>6</sub>)). Scan rate = 200 mv/s.

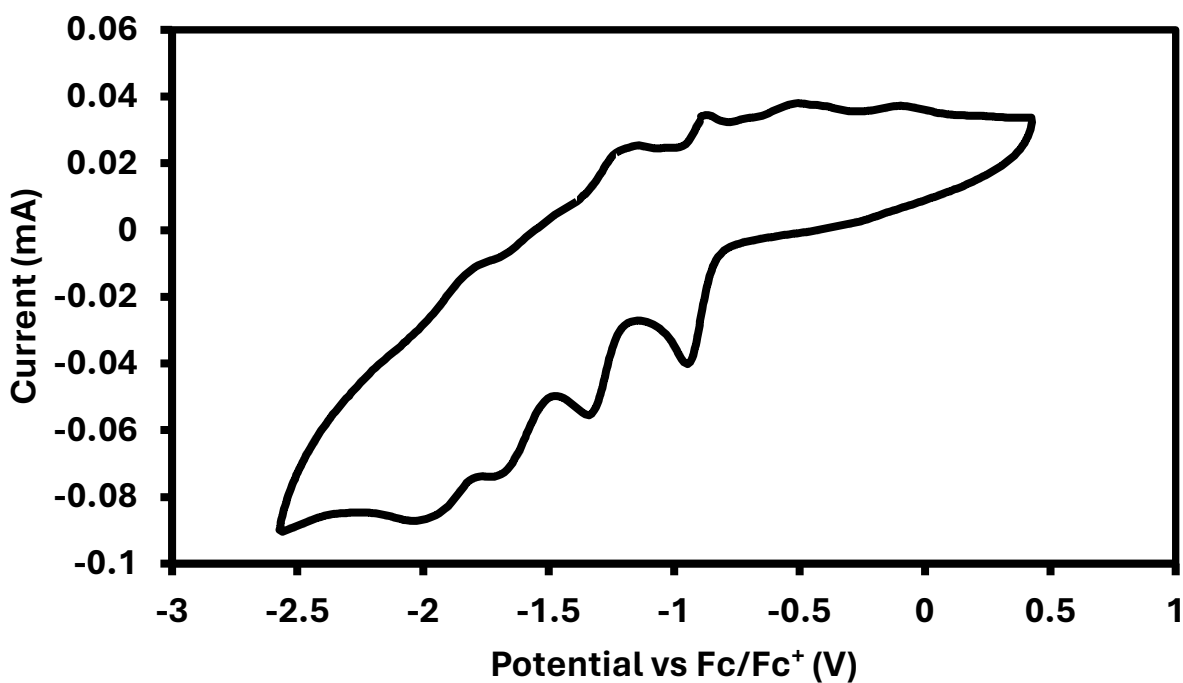

**Figure S34:** CV of  $(\text{TBA})_2[\text{Zr}\{\text{Mo}_5\text{O}_{13}(\text{OMe})_4\text{NO}\}_2]$  (1 mM) in MeCN (0.1 M  $\text{TBA}(\text{PF}_6)$ ) when scanned to more negative potentials. Scan rate = 200 mv/s.

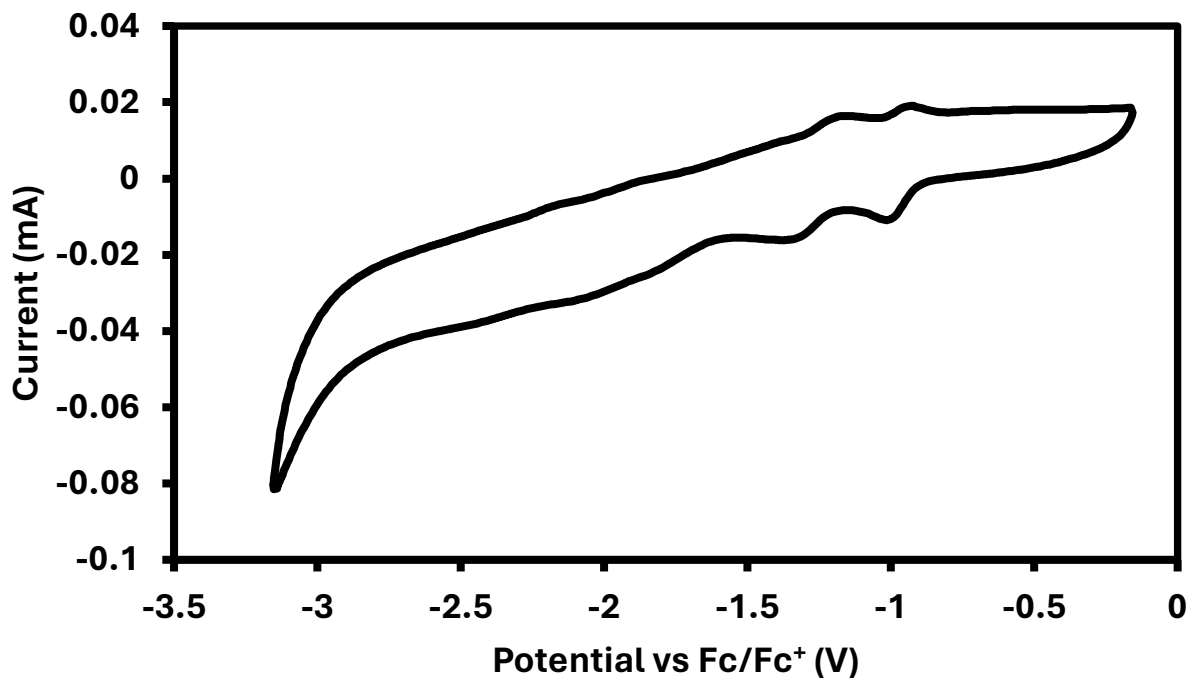

**Figure S35:** CV of  $(\text{TBA})_2[\text{Zr}\{\text{Mo}_5\text{O}_{13}(\text{OMe})_4\text{NO}\}_2]$  (1 mM) in MeCN (0.1 M  $\text{TBA}(\text{PF}_6)$ ) when scanned to more negative potentials. Scan rate = 200 mv/s.

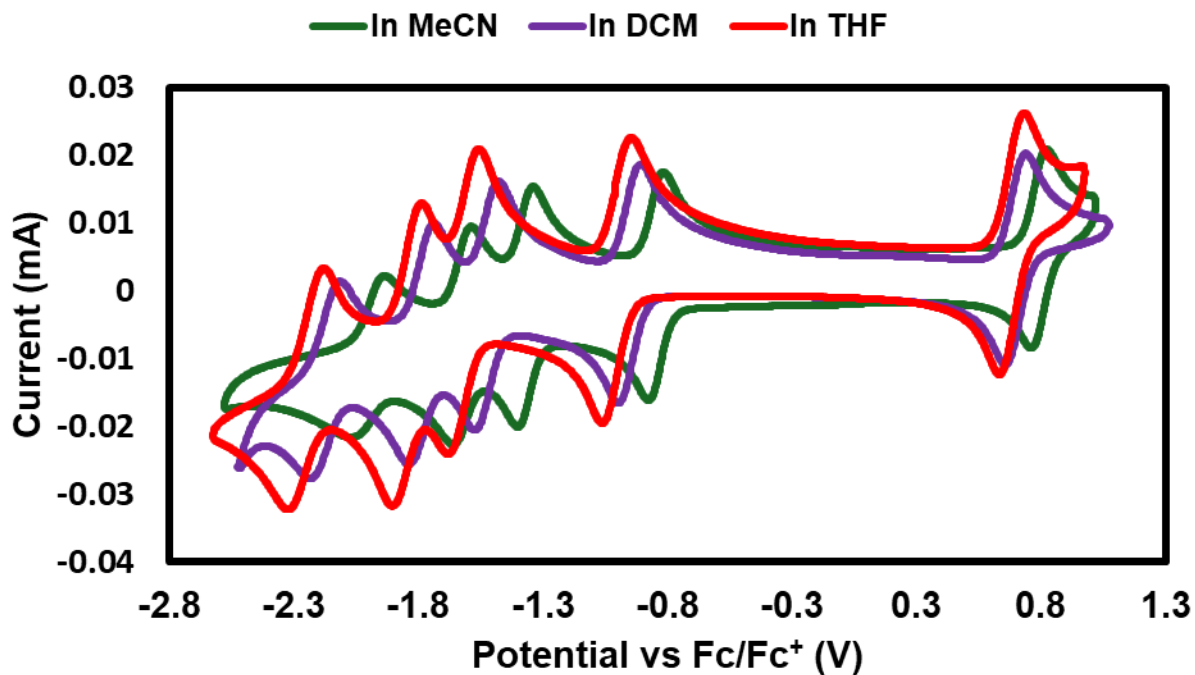

**Figure S36:** CV of  $(\text{TBA})_2[\text{U}\{\text{Mo}_5\text{O}_{13}(\text{OMe})_4\text{NO}\}_2]$  (1 mM) in MeCN, DCM, and THF (0.1 M  $\text{TBA}(\text{PF}_6)$ ). Scan rate = 200 mv/s.

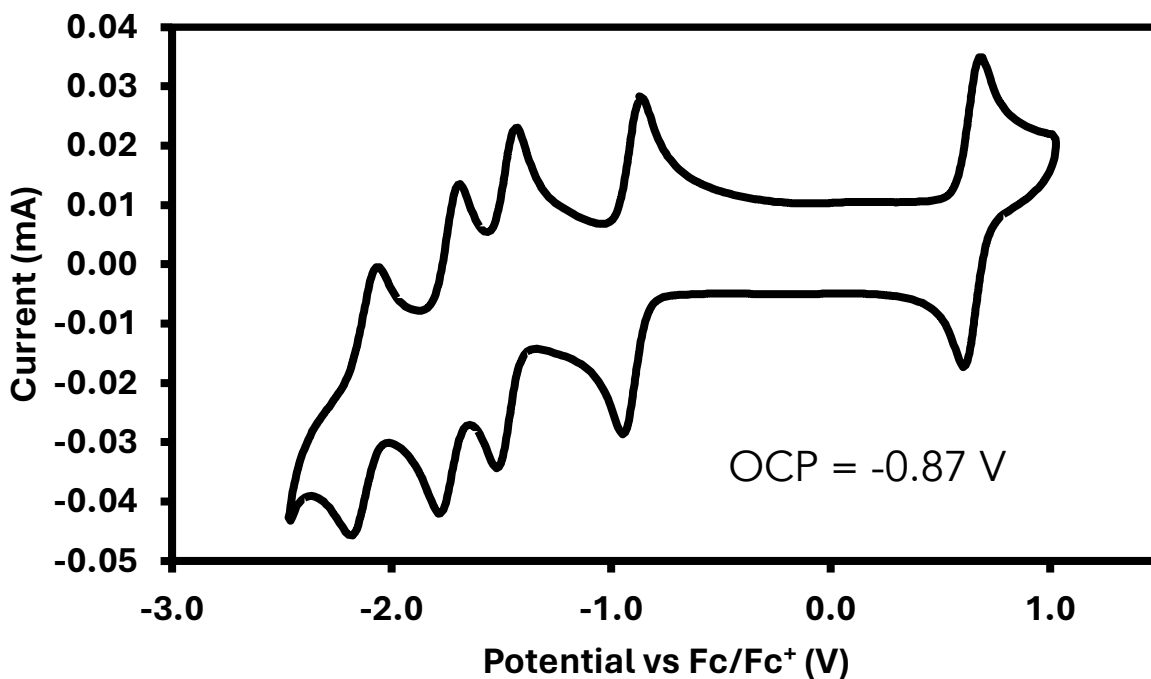

**Figure S37:** Pre bulk electrolysis CV of  $(\text{TBA})_2[\text{U}\{\text{Mo}_5\text{O}_{13}(\text{OMe})_4\text{NO}\}_2]$  (1 mM) in MeCN (0.1 M  $\text{TBA}(\text{PF}_6)$ ). Scan rate = 200 mv/s.

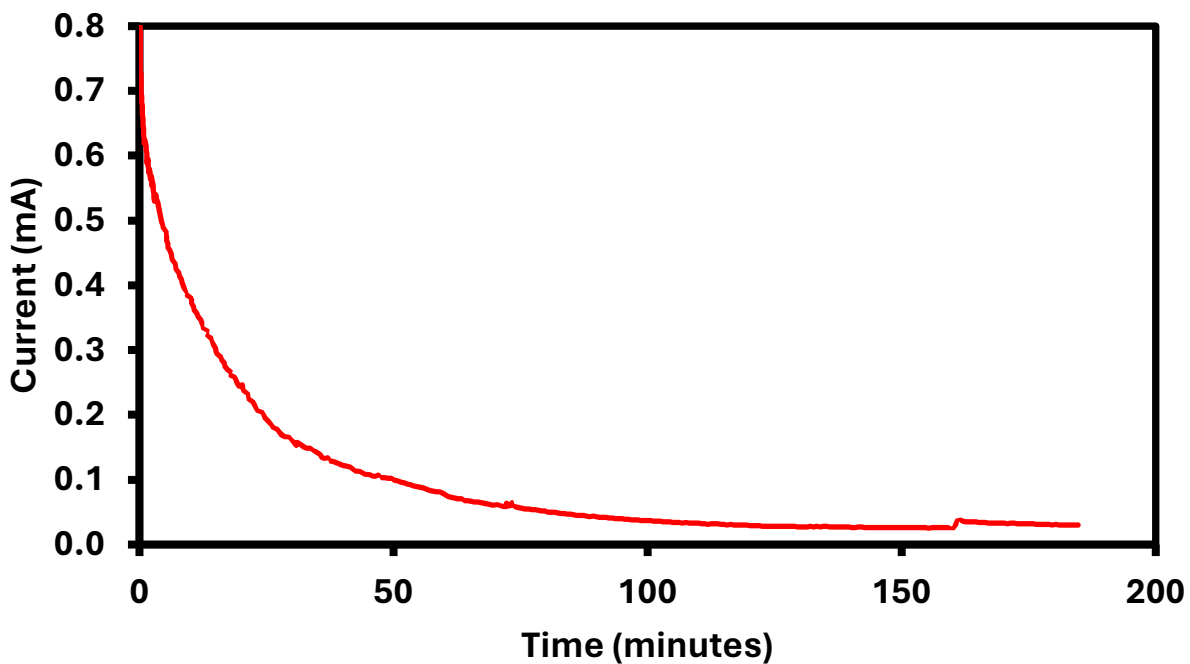

**Figure S38:** Bulk oxidation of a 1 mM solution of  $(\text{TBA})_2[\text{U}\{\text{Mo}_5\text{O}_{13}(\text{OMe})_4\text{NO}\}_2]$  in DCM (0.1 M  $\text{TBA}(\text{PF}_6)$ ). Chronoamperometry was performed at +0.78 V vs  $\text{Fc}/\text{Fc}^+$ .

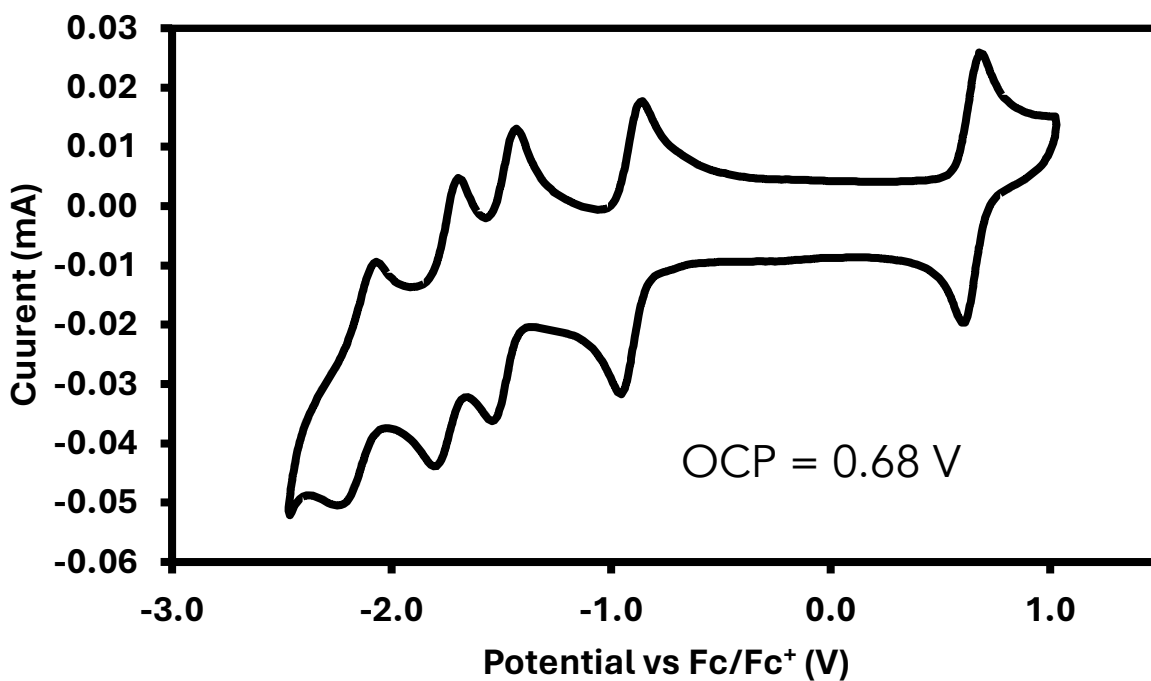

**Figure S39:** Post bulk electrolysis CV of  $(\text{TBA})_2[\text{U}\{\text{Mo}_5\text{O}_{13}(\text{OMe})_4\text{NO}\}_2]$  (1 mM) in MeCN (0.1 M  $\text{TBA}(\text{PF}_6)$ ). Scan rate = 200 mv/s.

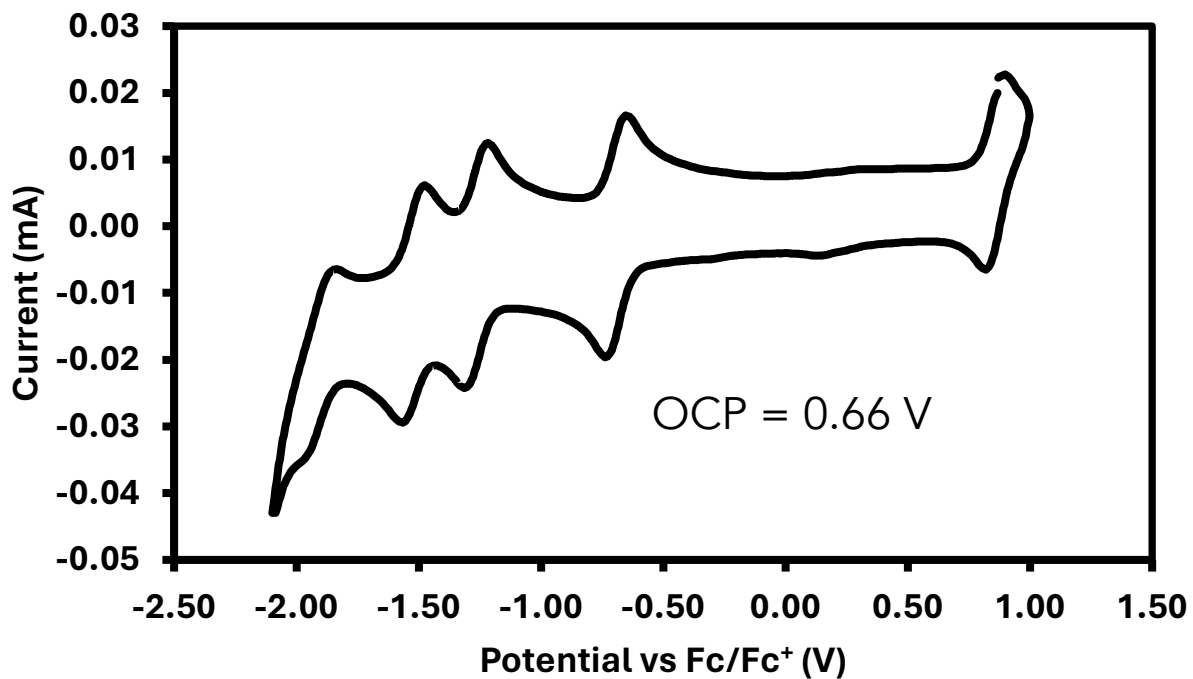

**Figure S40:** CV of crude  $(\text{TBA})[\text{U}\{\text{Mo}_5\text{O}_{13}(\text{OMe})_4\text{NO}\}_2]$  (1 mM) in DCM (0.1 M TBA(PF<sub>6</sub>)) obtained by oxidation of  $(\text{TBA})_2[\text{U}\{\text{Mo}_5\text{O}_{13}(\text{OMe})_4\text{NO}\}_2]$  with an excess of  $[\text{NO}][\text{PF}_6]$ . Scan rate = 200 mv/s.
